# Supplementary material for: METTL14 is required for exercise-induced cardiac hypertrophy and protects against myocardial ischemia-reperfusion injury
Source: PubMed Central journal article supplement (PMC9646739; doi:10.1038/s41467-022-34434-y), 2022-11-09
Supplement: 41467_2022_34434_MOESM1_ESM.pdf [file 41467_2022_34434_MOESM1_ESM.pdf]

## **Supplementary Information For**

### **METTL14 is required for exercise-induced cardiac hypertrophy and protects against myocardial ischemia-reperfusion injury**

Lijun Wang, Jiaqi Wang, Pujiao Yu, Jingyi Feng, Guie Xu, Xuan Zhao, Tianhui Wang, H. Immo Lehmann, Guoping Li, Joost PG Sluijter, Junjie Xiao \*

\* correspondence: [junjiexiao@shu.edu.cn](mailto:junjiexiao@shu.edu.cn) (Junjie Xiao)

**Supplementary Tables:**

**Supplementary Table 1. Related to method section.**

The body weights of mice before and after swim training/no training, and tibia length data, heart weights of the mice after swim training/no training in this study related to Figure 3.

|                        | Control group         |                       | Swim group            |                       |
|------------------------|-----------------------|-----------------------|-----------------------|-----------------------|
|                        | AAV9-cTnT-<br>Control | AAV9-cTnT-<br>METTL14 | AAV9-cTnT-<br>Control | AAV9-cTnT-<br>METTL14 |
| Before swim            |                       |                       |                       |                       |
| Body Weight(g)         | 24.60±0.756           | 24.08±0.914           | 24.33±1.007           | 24.21±0.614           |
| After swim/no training |                       |                       |                       |                       |
| Body Weight(g)         | 25.88±1.004           | 25.50±0.787           | 22.51±0.821           | 22.38±0.716           |
| Heart Weight(g)        | 0.098±0.016           | 0.097±0.002           | 0.124±0.006           | 0.107±0.006           |
| Tibia length(cm)       | 1.632±0.017           | 1.639±0.013           | 1.640±0.022           | 1.643±0.011           |
| HW/TL(g/cm)            | 0.060±0.010           | 0.059±0.001           | 0.076±0.003           | 0.065±0.004           |
| HW/BW(g/g)             | 0.004±0.0005          | 0.004±0.0001          | 0.006±0.0004          | 0.005±0.0003          |

The body weights of mice before and after swim training/no training, and tibia length data, heart weights of the mice after swim training/no training in this study related to Figure 4.

|                        | Control group             |                                         |                                          | Swim group                |                                         |                                          |
|------------------------|---------------------------|-----------------------------------------|------------------------------------------|---------------------------|-----------------------------------------|------------------------------------------|
|                        | AAV9-<br>cTnT-<br>Control | AAV9-<br>cTnT-<br>WT <sup>METTL14</sup> | AAV9-<br>cTnT-<br>Mut <sup>METTL14</sup> | AAV9-<br>cTnT-<br>Control | AAV9-<br>cTnT-<br>WT <sup>METTL14</sup> | AAV9-<br>cTnT-<br>Mut <sup>METTL14</sup> |
| Before swim            |                           |                                         |                                          |                           |                                         |                                          |
| Body Weight(g)         | 25.68±1.07<br>2           | 25.76±0.97<br>9                         | 25.65±0.39<br>1                          | 25.61±0.89<br>9           | 25.68±0.75<br>7                         | 25.69±0.44<br>1                          |
| After swim/no training |                           |                                         |                                          |                           |                                         |                                          |
| Body Weight(g)         | 26.74±0.78<br>8           | 26.68±0.69<br>9                         | 26.46±0.93<br>4                          | 22.53±1.40<br>6           | 22.66±0.61<br>5                         | 22.43±0.69<br>2                          |
| Heart Weight(g)        | 0.098±0.00<br>4           | 0.099±0.00<br>3                         | 0.096±0.00<br>7                          | 0.124±0.01<br>1           | 0.101±0.00<br>7                         | 0.119±0.00<br>7                          |
| Tibia length(cm)       | 1.774±0.00<br>4           | 1.774±0.00<br>3                         | 1.774±0.00<br>4                          | 1.775±0.00<br>4           | 1.774±0.00<br>3                         | 1.775±0.00<br>2                          |
| HW/TL(g/cm)            | 0.055±0.00<br>2           | 0.056±0.00<br>2                         | 0.054±0.00<br>4                          | 0.070±0.00<br>6           | 0.057±0.00<br>4                         | 0.067±0.00<br>4                          |
| HW/BW(g/g)             | 0.004±0.00<br>02          | 0.004±0.00<br>02                        | 0.004±0.00<br>03                         | 0.006±0.00<br>03          | 0.005±0.00<br>03                        | 0.005±0.00<br>03                         |

**Supplementary Table 2. Related to method section.**

Parameters of echocardiography.

|                         | Sham            |                     | I/R 3w          |                     |
|-------------------------|-----------------|---------------------|-----------------|---------------------|
|                         | AAV9-cTnT-shScr | AAV9-cTnT-shMETTL14 | AAV9-cTnT-shScr | AAV9-cTnT-shMETTL14 |
| Heart rate (BPM)        | 479±48          | 458±34              | 450±29          | 438±17              |
| LVESD (mm)              | 2.7±0.3         | 2.6±0.3             | 3.2±0.3**       | 2.4±0.4##           |
| LVEDD (mm)              | 3.8±0.3         | 3.6±0.3             | 3.8±0.4         | 3.5±0.5             |
| LV Volume; s (µl)       | 27.0±8.1        | 24.5±5.6            | 39.3±6.9*       | 20.9±10.4##         |
| LV Volume; d (µl)       | 61.9±13.9       | 55.8±10.3           | 61.1±13.3       | 51.6±16.9           |
| LVAW; s (mm)            | 1.1±0.1         | 1.2±0.1             | 1.0±0.1         | 1.2±0.1##           |
| LVAW; d (mm)            | 0.8±0.1         | 0.8±0.1             | 0.9±0.1         | 0.9±0.1             |
| LVPW; s (mm)            | 1.1±0.1         | 1.1±0.1             | 0.9±0.1         | 1.1±0.2#            |
| LVPW; d (mm)            | 0.8±0.1         | 0.8±0.1             | 0.7±0.1         | 0.8±0.2             |
| LV Mass (mg)            | 103.8±20.4      | 98.1±7.9            | 105.6±22.1      | 98.7±21.2           |
| LV Mass Cor (mg)        | 83.0±16.3       | 78.5±6.3            | 84.5±17.7       | 78.9±17.0           |
| Stroke Volume (µl)      | 35.0±6.5        | 31.3±6.0            | 23.5±4.8**      | 30.7±7.9            |
| Cardiac output (ml/min) | 16.6±2.5        | 14.3±2.9            | 10.3±2.3**      | 13.4±3.3            |

Abbreviation: BPM, beat per minute; LVESD, left ventricular end-systolic dimension; LVEDD, left ventricular end-diastolic dimension; LV Volume s, left ventricular volume systolic; LV Volume d, left ventricular volume diastolic; LVAWs, left ventricular anterior wall thickness systolic; LVAWd, left ventricular anterior wall thickness diastolic; LVPWs, left ventricular posterior wall thickness systolic; LVPWd, left ventricular posterior wall thickness diastolic; LV Mass, left ventricular mass index.

Data are presented as mean±SD. \*,  $p<0.05$  compared to AAV9-cTnT-shScr +Sham; \*\*,  $p<0.01$  compared to AAV9-cTnT-shScr +Sham; #,  $p<0.05$  compared to AAV9-cTnT-shScr +I/R 3w; ##,  $p<0.01$  compared to AAV9-cTnT-shScr +I/R 3w. (Two-way ANOVA, Tukey)

**Supplementary Table 3. Related to method section.**

The primer sequences used for quantitative PCR were as follows:

|                                                | <b>Forward</b>          | <b>Reverse</b>          |
|------------------------------------------------|-------------------------|-------------------------|
| <b><i>For gene expression qPCR primers</i></b> |                         |                         |
| <i>rat-Mettl14</i>                             | TGGGGATCAAAGGAACCGTG    | GCCTGATAGTGCTGTCCCTC    |
| <i>rat-Phlpp2</i>                              | GCGTCTGACGAACACAACAC    | CAGACTACAGCGCCTCTCAG    |
| <i>mmu-Mettl14</i>                             | CTGAGAGTGCGGATAGCATTG   | GAGCAGATGTATCATAGGAAGCC |
| <i>mmu-Anp</i>                                 | TCTTCCTCGTCTTGCCCTTT    | CCAGGTGGTCTAGCAGGTT     |
| <i>mmu-Bnp</i>                                 | TGGGAGGTCACCTCCTATCCT   | GGCCATTTCCCTCCGACTTT    |
| <i>mmu-βMhc</i>                                | CGGACCTTGAAGACCAGAT     | GACAGCTCCCCATTCTCTGT    |
| <i>mmu-αSma</i>                                | GTCCAGACATCAGGGAGTAA    | TCGGATACTTCAGCGTCAGGA   |
| <i>rat-Anp</i>                                 | GAAGATGCCGGTAGAAGATGAG  | AGAGCCCTCAGTTTGCTTTTC   |
| <i>rat-Bnp</i>                                 | GGTGCTGCCCCAGATGATT     | CTGGAGACTGGCTAGGACTTC   |
| <i>rat-βMhc</i>                                | GCCCCAATGCAGCCAT        | CGCTCAGTCATGGCGGAT      |
| <i>18s</i>                                     | TCAAGAACGAAAGTCGGAGG    | GGACATCTAAGGGCATCAC     |
| <i>rat-Gapdh</i>                               | TGACAACTCCCTCAAGATTGTCA | GGCATGGACTGTGGTCATGA    |
| <i>mmu-Gapdh</i>                               | AGGTCGGTGTGAACGGATTTG   | TGTAGACCATGTAGTTGAGGTCA |
| <i>mmu-Mettl14-specific for Mutant</i>         | AAAGTGGGGTTACGCAGCA     | CTAGGCTTCACGGTTCCTTTGA  |
| <i>mmu-Phlpp2</i>                              | GCTCCCGAAGAACTCTTCCAA   | GTCTTCGGATCCCAAACCCC    |
| <i>mmu-Mettl3</i>                              | CTGGGCACTTGGATTTAAGGAA  | TGAGAGGTGGTGTAGCAACTT   |
| <i>mmu-Wtap</i>                                | GAACCTCTTCTAAAAAGGTCCG  | TTAACTCATCCCGTGCCATAAC  |
| <i>mmu-Fto</i>                                 | TTCATGCTGGATGACCTCAATG  | GCCAACTGACAGCGTTCTAAG   |
| <i>mmu-Alkbh5</i>                              | CGCGGTCATCAACGACTACC    | ATGGGCTTGAAGTGAAGCTTG   |
| <i>mmu-Zc3h13</i>                              | AGCACTGGAAGCACAACAGA    | GTAGCCTTCCCACGAGGTG     |
| <i>mmu-Rbm15b</i>                              | TATAGCCGCTCAGTTCGCAG    | GAGTGAGTTGTCCTCCCACG    |
| <b><i>For MazF-qPCR primers</i></b>            |                         |                         |
| <i>rat-Phlpp2-1</i>                            | TCACATGGATTTGCGGGACA    | TCTCAACTGGTTCGCTCAC     |
| <i>rat-Phlpp2-2</i>                            | GCGTCTGACGAACACAACAC    | CAGACTACAGCGCCTCTCAG    |
| <i>rat-Phlpp2-3</i>                            | GACATTCATTGCTGCCGAGG    | CCCAACCCCTAGCATGTTC     |
| <i>rat-Phlpp2-4</i>                            | CCACAGAAGCACCCAAGAGG    | GGTCACGGGGGACAACAAAT    |
| <i>rat-Phlpp2-5</i>                            | CACTGTGGGAACACTTGTCTT   | AGCAGCAGCTAATGGGTCTT    |
| <i>mmu-Phlpp2-0</i>                            | ATGTGCCAAGCTGTCCTGTG    | GGGTGATGCTCCAAGCTGAA    |
| <i>mmu-Phlpp2-1</i>                            | GCTCCCGAAGAACTCTTCCAA   | GTCTTCGGATCCCAAACCCC    |
| <i>mmu-Mettl14-0</i>                           | TGCATCGTATTTAGTGCCC     | CGGTGGAAGCCTCTCGATTT    |
| <i>mmu-Mettl14-1</i>                           | ACTCAAACGGAAGTGTCTGG    | TCTTCTCCTGCTGCATTTT     |
| <i>mmu-Phlpp1-0</i>                            | CCACCTAGGAGCCTTTCCGT    | GCAGGGCATTGCAAGATACA    |
| <i>mmu-Phlpp1-1</i>                            | CACCTGCCAGACTGTTACGA    | TCTGGGAGAGGGCATGAAGT    |

---

|                     |                      |                        |
|---------------------|----------------------|------------------------|
| <i>mmu-Phlpp2-2</i> | GTTGAGCACTAGCAGGGTCT | GGAGTCCAACCAAGGTCCAAT  |
| <i>mmu-Phlpp2-3</i> | GCCAGCGAACAGAGACAAGA | CCTCTAGGGGCACAATGGAG   |
| <i>mmu-Phlpp2-4</i> | TACCTCTCGTGTGGACGCAG | ATGGTTTGAAACACTGAGGCAA |

---

**Supplementary Table 4. Related to method section.**

> *Rattus* PHLPP2(Reference Sequence: NM\_001109131.2)

The potential m<sup>6</sup>A modification sites were browsed by RMBase 2.0 database (Species *Rattus*).

Control Amplicon primer F1/R1

TCACATGGATTGCGGGACAATCAGTTGACTGATTTGGACCTTAGCTCCT  
TATGTAGCTTGGAGCAGCTGCATTGTGAGCGGAACCAGTTGAGA

Targeting Amplicon primer F2/R2

GCGTCTGACGAACACAACACTGTGGGCCTGGAGACGAGCTTGCTTCCCA  
GGCCTGAGAGGCGCTGTAGTCTG

Targeting Amplicon primer F3/R3

Targeting Amplicon primer F4/R4

TCTGACAATGGACTGGACAGTGACGATGACCAGCCTGTTGAAGGCGTCA  
TAACCAATGGCAGCAGGGTTGAGGTAGAGGTAGACATTCATTGCTGCCG  
AGGCAGAGAGTCTGAGAACTCCCCTACTCTCCCGAAGAATTCTTCCTAC  
CCCTG TTCAGAGGAACATGCTAGGGGGTTGGGTTTTGGGATCCGAAGAC  
AGAACAGTGTGAATAGTGGTATACTTCTGCCAGTGAACAAAGACAAGAT  
GGAGTTACAGAAGTCTCCCTCCACTTCTTGTTTGTATGGAAAGAACTCT  
CCAATGGCTCCATTGTGCCCTAGAAGACAGCCTGAACCTCATTGAGGTG  
GCCACAGAAGCACCCAAGAGGAAA ACTGGCTATTTTGCTGCCCCCACTC  
AGCTGGAACCAGAGGATCAATTTGTTGTCCCCCGTGACCTGGAAGACGA  
AGTGAAGGAGCAAATGAAGCAGCACCAGGAGAGCAGGCCTGAGCCTGA  
ACCCAGGGAAGAGGACCGGACAGAGCCCCTGCAGGAGTTTGATACAGC  
ACTGTGA

Targeting Amplicon primer F5/R5

CACTGTGGGAACACTTGTCCTATCTAGAAGCTGTCAGTGCAGTCCGTCAT  
GTGCAAGACCCATTAGCTGCTGCT

*mmu*PHLPP2 m<sup>6</sup>A peak region in meRIP-seq:

>Chr8:109939973-109941393(+)

TGTGCACATTAGCCCAGAGCTACGGTTGTCAGGACAACGTGGGGGCAAT  
GGTGGTTTATTTGAATATTGGTGAAGAAGGCTGTACCTGTGAAATGAATG  
GGCTCACCCCTCCAGGCCCTGTGGGATTTGCTTCAACTGCAGCCCTCAA  
GGATACTCCCAAGCCAACCACTCCCTCCTCCAGTAGTGGGATTGCCTCCG  
AGTTCAGCAGTGAGATGTCCACCTCAGAGGTGAGCAGTGAAGTGGGCTC  
CACGGCCTCGGATGAGCACAACACTGTGGGCCTGGAGGCGAGCTTGCTG  
CCCAGGCCAGAGAGGCGCTGCAGTCTGCACCCAGCGTCCTCCGCAGGG  
GTGTTCCAGCGCCAGCCTTCTTGTGCTACTTTTTCCAGCAATCAGTCTGA  
CAATGGCCTGGACAGTGACGATGACCAGCCTGTTGAAGGAGTCATAACC  
AACGGCAGCAGGGTTGAAGTAGAGGTAGACATCCATTGCTGCCGAGGCA  
GAGAGCCAGAGAGCTCCCCTCCGCTCCCGAAGAACTCTCCAACGCCTG  
TTCAGAGGAGCGTGCTAGAGGGGCGGGGTTTGGGATCCGAAGACAGAA  
CAGTGTCAACAGTGGTATACTTCTGCCAGCGAACAGAGACAAGATGGAG  
CTGCAGAAGTCTCCCTCCACTTCTTGTCTGTATGGAAAGAACTCTCCAA  
TGGCTCCATTGTGCCCTAGAGGACAGCCTGAACCTCATTGAGGTGGCC  
ACAGAAGCACCCAAAAGGAAAAGTGGCTACTTTGCTGCCCCCACTCAGC  
TGGAACCAGAGGATCAGTTTGTCTCCCTCGAGACCTGGAAGAGGAAGT  
GAAGGAGCAGATGAAGCAGCACCAAGGAGGGCAGGCCTGAGCCCGAGCC  
CCGGGGAGAGGAGCGGACAGAGCCCCTGGAGGAGTTTGATAACAGCACT  
GTGATTGTACCTCTCGTGTGGACGCAGCCTGAGGGAGGGCTGTGTGGTA  
TTGGGGAAGGGACCTTCAGGAGATATTTGCCTCAGTGTTTCAAACCATAG  
ATAATATGGAGTAGAATTTGGAGCCAAAAGTTGAGCACTAGCAGGGTC  
TGGCTCTTGATGGGCTCGGACCGCCATCAGTGTTAAGCTTCACATTGGAC  
CTTGGTTGGACTCCCAGCGTTGCTGGGAGACAGCAGATGTTCTGTGTCA  
GTCCTGCCACCTGCCATTAACCTTTCTCTCCTAGGATCATTTGAGAAATT  
GCCTGCCTGGGCAGGAAAGGGACTATTTCTGTGGAGGAAGTAACTGAAG  
GTTGATTCCCTTTACTAATTGCTGCTGATGGATCTCTGTGACAAGAGAAAT





|            |                                                                                                                           |      |      |      |      |      |      |      |      |      |      |      |      |      |
|------------|---------------------------------------------------------------------------------------------------------------------------|------|------|------|------|------|------|------|------|------|------|------|------|------|
|            | 2211                                                                                                                      | 2220 | 2230 | 2240 | 2250 | 2260 | 2270 | 2280 | 2290 | 2300 | 2310 | 2320 | 2330 | 2340 |
| mPHLPP2    | -----                                                                                                                     |      |      |      |      |      |      |      |      |      |      |      |      |      |
| rat.PHLPP2 | ARCAGCTTAAAGCTATCCACACCATGCAAACTGCAAAAGACTGCACACCTTGTGCACATGCCACACATCAGCATTTTCCAGAGATCTGCAGCTGCCTCAGATTGATTTGTGACCTGA     |      |      |      |      |      |      |      |      |      |      |      |      |      |
| Consensus  | -----                                                                                                                     |      |      |      |      |      |      |      |      |      |      |      |      |      |
|            | 2341                                                                                                                      | 2350 | 2360 | 2370 | 2380 | 2390 | 2400 | 2410 | 2420 | 2430 | 2440 | 2450 | 2460 | 2470 |
| mPHLPP2    | -----                                                                                                                     |      |      |      |      |      |      |      |      |      |      |      |      |      |
| rat.PHLPP2 | GTTGCARATGTTGACAGAACTACTAATCCAGAGACTTGCCTGCCACTTACAGAACTTGATCTTACAGAAATACAAATCTGGTTCTGGACACAGAGCTTTGGACATGTTTGCATATCACAC  |      |      |      |      |      |      |      |      |      |      |      |      |      |
| Consensus  | -----                                                                                                                     |      |      |      |      |      |      |      |      |      |      |      |      |      |
|            | 2471                                                                                                                      | 2480 | 2490 | 2500 | 2510 | 2520 | 2530 | 2540 | 2550 | 2560 | 2570 | 2580 | 2590 | 2600 |
| mPHLPP2    | -----                                                                                                                     |      |      |      |      |      |      |      |      |      |      |      |      |      |
| rat.PHLPP2 | ACTGAAATGATCAGAACTTTACCAGCCAGACTTACAGTACATCACTCTGGAGCCATGGACTGCCAGATGGCTGGGACAGAAATAACTCTGTGTGTCTGCTGGCTGGATGAC           |      |      |      |      |      |      |      |      |      |      |      |      |      |
| Consensus  | -----                                                                                                                     |      |      |      |      |      |      |      |      |      |      |      |      |      |
|            | 2601                                                                                                                      | 2610 | 2620 | 2630 | 2640 | 2650 | 2660 | 2670 | 2680 | 2690 | 2700 | 2710 | 2720 | 2730 |
| mPHLPP2    | -----                                                                                                                     |      |      |      |      |      |      |      |      |      |      |      |      |      |
| rat.PHLPP2 | TTTGCAGGGGGCTGGGGCTGTGTAGCCATGTTTGTGGGACAGAAATGAGAACTCCCTCCCTGCTGCAGTGTACATGGCAGCGTCTTTTGGAGAGGATACAGCACTACACAGTGCACCCG   |      |      |      |      |      |      |      |      |      |      |      |      |      |
| Consensus  | -----                                                                                                                     |      |      |      |      |      |      |      |      |      |      |      |      |      |
|            | 2731                                                                                                                      | 2740 | 2750 | 2760 | 2770 | 2780 | 2790 | 2800 | 2810 | 2820 | 2830 | 2840 | 2850 | 2860 |
| mPHLPP2    | -----                                                                                                                     |      |      |      |      |      |      |      |      |      |      |      |      |      |
| rat.PHLPP2 | TTTCTATGCAATACCTTCTGGTGTCTCACAGAAATGAGAACTGGCCAGAACTAGTTCTCTGCTCTCTGCTGTATATTGACTGACACTGCCAGCCACAGATGTTTGTAGCTGAC         |      |      |      |      |      |      |      |      |      |      |      |      |      |
| Consensus  | -----                                                                                                                     |      |      |      |      |      |      |      |      |      |      |      |      |      |
|            | 2861                                                                                                                      | 2870 | 2880 | 2890 | 2900 | 2910 | 2920 | 2930 | 2940 | 2950 | 2960 | 2970 | 2980 | 2990 |
| mPHLPP2    | -----                                                                                                                     |      |      |      |      |      |      |      |      |      |      |      |      |      |
| rat.PHLPP2 | TGTGACATGTTGACAGCTGCAGCTGTCTGTGCCAGGTGGAAAGCCAGTACTTCTTAAGTCTTCAAGCTGGAGATGACCCAGAGGAGGACAGAGGGGTGAGGACCCAGAACTATCATATA   |      |      |      |      |      |      |      |      |      |      |      |      |      |
| Consensus  | -----                                                                                                                     |      |      |      |      |      |      |      |      |      |      |      |      |      |
|            | 2991                                                                                                                      | 3000 | 3010 | 3020 | 3030 | 3040 | 3050 | 3060 | 3070 | 3080 | 3090 | 3100 | 3110 | 3120 |
| mPHLPP2    | -----                                                                                                                     |      |      |      |      |      |      |      |      |      |      |      |      |      |
| rat.PHLPP2 | ACAGAGGACACAGAGGTGATGGGGTACTGCTGCACCCAGATGCTGGATGTACATCACTCAACCTGGATCTCCCAAGCTCAATATCTCCACTCCGCTTACCATCAGATGAAATGCTGTA    |      |      |      |      |      |      |      |      |      |      |      |      |      |
| Consensus  | -----                                                                                                                     |      |      |      |      |      |      |      |      |      |      |      |      |      |
|            | 3121                                                                                                                      | 3130 | 3140 | 3150 | 3160 | 3170 | 3180 | 3190 | 3200 | 3210 | 3220 | 3230 | 3240 | 3250 |
| mPHLPP2    | -----                                                                                                                     |      |      |      |      |      |      |      |      |      |      |      |      |      |
| rat.PHLPP2 | TTTTGGAAACCAAGCACTGTGGAAACACTGTCTATCTAGAGCTGTCACTGCAGTCCCTCATGTGCAGAGCCATTAAGTGTCTGTAAGAGCTGTGCACACACACTCAGAGCTGCCCCAGACA |      |      |      |      |      |      |      |      |      |      |      |      |      |
| Consensus  | -----                                                                                                                     |      |      |      |      |      |      |      |      |      |      |      |      |      |
|            | 3251                                                                                                                      | 3260 | 3270 | 3280 | 3290 | 3300 | 3310 | 3320 | 3330 | 3340 | 3350 | 3360 | 3370 | 3380 |
| mPHLPP2    | -----                                                                                                                     |      |      |      |      |      |      |      |      |      |      |      |      |      |
| rat.PHLPP2 | CAGCTGGGGCAGTGGTGGTATTTGAAATTTGGTGAAGAGGCTGACCTGTGAATGATGGCTTCCCTTCCAGGCTGTGGATTTGCTCAACAGGCTCCAGAAATCTCCAGAGCA           |      |      |      |      |      |      |      |      |      |      |      |      |      |
| Consensus  | -----                                                                                                                     |      |      |      |      |      |      |      |      |      |      |      |      |      |
|            | 3381                                                                                                                      | 3390 | 3400 | 3410 | 3420 | 3430 | 3440 | 3450 | 3460 | 3470 | 3480 | 3490 | 3500 | 3510 |
| mPHLPP2    | -----                                                                                                                     |      |      |      |      |      |      |      |      |      |      |      |      |      |
| rat.PHLPP2 | ACCACTCCCTCCCTCAGTGTGGATGCTCCAGTTCAGAGTGAATGTCCACTCAGAGGTGAGCAGTGAAGTGGCTCCAGGCTCCAGATGAGCAGCACTTGGGCTGGAGGCGAGCTTGC      |      |      |      |      |      |      |      |      |      |      |      |      |      |
| Consensus  | -----                                                                                                                     |      |      |      |      |      |      |      |      |      |      |      |      |      |
|            | 3511                                                                                                                      | 3520 | 3530 | 3540 | 3550 | 3560 | 3570 | 3580 | 3590 | 3600 | 3610 | 3620 | 3630 | 3640 |
| mPHLPP2    | -----                                                                                                                     |      |      |      |      |      |      |      |      |      |      |      |      |      |
| rat.PHLPP2 | TCCAGGCTGAGAGGCGCTGAGCTGCACCCAGCTCCCTCCAGGGGTTCACAGGCGAGCTTCTGTGTACTTTTCCAGCACTGATGACATGCTGGAGTGGATGACATGACAGCC           |      |      |      |      |      |      |      |      |      |      |      |      |      |
| Consensus  | -----                                                                                                                     |      |      |      |      |      |      |      |      |      |      |      |      |      |
|            | 3641                                                                                                                      | 3650 | 3660 | 3670 | 3680 | 3690 | 3700 | 3710 | 3720 | 3730 | 3740 | 3750 | 3760 | 3770 |
| mPHLPP2    | -----                                                                                                                     |      |      |      |      |      |      |      |      |      |      |      |      |      |
| rat.PHLPP2 | TGTGAGAGGCTCATACCAACGGCAGCGGGTTGAGTAGAGGTAGACATCAATGCTGCCAGGCGAGAGCCAGAGACTCCCTCCCTCCAGAGACTCTCCAGGCTTTCAGAGGAGGT         |      |      |      |      |      |      |      |      |      |      |      |      |      |
| Consensus  | -----                                                                                                                     |      |      |      |      |      |      |      |      |      |      |      |      |      |
|            | 3771                                                                                                                      | 3780 | 3790 | 3800 | 3810 | 3820 | 3830 | 3840 | 3850 | 3860 | 3870 | 3880 | 3890 | 3900 |
| mPHLPP2    | -----                                                                                                                     |      |      |      |      |      |      |      |      |      |      |      |      |      |
| rat.PHLPP2 | GCTAGGGGGCGGGTTGGGATCCGAGAGCAGACAGTGTCAACAGTGGTATCTCTGCCAGCAGAGGAGAGCAGATGGAGCTGAGAGCTCCCTCCACTCTTGTGTATGGAAAGAACTCT      |      |      |      |      |      |      |      |      |      |      |      |      |      |
| Consensus  | -----                                                                                                                     |      |      |      |      |      |      |      |      |      |      |      |      |      |
|            | 3901                                                                                                                      | 3910 | 3920 | 3930 | 3940 | 3950 | 3960 | 3970 | 3980 | 3990 | 4000 | 4010 | 4020 | 4030 |
| mPHLPP2    | -----                                                                                                                     |      |      |      |      |      |      |      |      |      |      |      |      |      |
| rat.PHLPP2 | CAATGGCTCATTGTGCCCCAGAGCAGCTGAACTCATGAGGTGGCCAGAGAGCCCAAGAGAAACTGGCTACTTGTGCCCCACTCAGCTGAAACAGAGGATCAGTTTGTGCTGCC         |      |      |      |      |      |      |      |      |      |      |      |      |      |
| Consensus  | -----                                                                                                                     |      |      |      |      |      |      |      |      |      |      |      |      |      |
|            | 4031                                                                                                                      | 4040 | 4050 | 4060 | 4070 | 4080 | 4090 | 4100 | 4110 | 4120 | 4130 | 4140 | 4150 | 4160 |
| mPHLPP2    | -----                                                                                                                     |      |      |      |      |      |      |      |      |      |      |      |      |      |
| rat.PHLPP2 | TCGAGCTGGAGAGGAGTGAAGGAGCAGATGAGCAGCAGCAGAGGGCGAGGCTGAGCCGAGCCCGGGGAGAGGAGCGGACAGAGCCCTGGAGGATTTGATACAGCACTGTGATGTACTTC   |      |      |      |      |      |      |      |      |      |      |      |      |      |
| Consensus  | -----                                                                                                                     |      |      |      |      |      |      |      |      |      |      |      |      |      |
|            | 4161                                                                                                                      | 4170 | 4180 | 4190 | 4200 | 4210 | 4220 | 4230 | 4240 | 4250 | 4260 | 4270 | 4280 | 4290 |
| mPHLPP2    | -----                                                                                                                     |      |      |      |      |      |      |      |      |      |      |      |      |      |
| rat.PHLPP2 | TCGTGTGACCGAGCTGAGGGGGGCTGTGTGATTTGGGAGGGGACTTCAGGATATTTGCTCAGTGTTCACACATAGATATATGAGTAGAATTTGGGCCAAAAGTTGACACTAGCA        |      |      |      |      |      |      |      |      |      |      |      |      |      |
| Consensus  | -----                                                                                                                     |      |      |      |      |      |      |      |      |      |      |      |      |      |
|            | 4291                                                                                                                      | 4300 | 4310 | 4320 | 4330 | 4340 | 4350 | 4360 | 4370 | 4380 | 4390 | 4400 | 4410 | 4420 |
| mPHLPP2    | -----                                                                                                                     |      |      |      |      |      |      |      |      |      |      |      |      |      |
| rat.PHLPP2 | GGGTCTGGCTTGTATGGCTGCAGCCCATCAGTGTAGCTTACATGGACTTGGTTGGACTCCAGGCTTGTGGAGACAGCAATGTTCTGTGACTGCTGCCACTGCCATTAACCTTT         |      |      |      |      |      |      |      |      |      |      |      |      |      |
| Consensus  | -----                                                                                                                     |      |      |      |      |      |      |      |      |      |      |      |      |      |
|            | 4421                                                                                                                      | 4430 | 4440 | 4450 | 4460 | 4470 | 4480 | 4490 | 4500 | 4510 | 4520 | 4530 | 4540 | 4550 |
| mPHLPP2    | -----                                                                                                                     |      |      |      |      |      |      |      |      |      |      |      |      |      |
| rat.PHLPP2 | CTCTCCTAGGATCATTGAGAAATGCTGCTGGGACGAAAGGACTATTCTGTGGAGGAACTACTGAGGTTGATCCCTTACTAATGCTGCTGTATGGATCTGTGACAGAGAACTACCT       |      |      |      |      |      |      |      |      |      |      |      |      |      |
| Consensus  | -----                                                                                                                     |      |      |      |      |      |      |      |      |      |      |      |      |      |
|            | 4551                                                                                                                      | 4560 | 4570 | 4580 | 4590 | 4600 | 4610 | 4620 | 4630 | 4636 |      |      |      |      |
| mPHLPP2    | -----                                                                                                                     |      |      |      |      |      |      |      |      |      |      |      |      |      |
| rat.PHLPP2 | TATCTCTCAGCTACTAGTGGATGTGATGTACTAGTCACTGGCTTTTATCTCTAGGAACTACAGCTTACAAATGCTATA                                            |      |      |      |      |      |      |      |      |      |      |      |      |      |
| Consensus  | -----                                                                                                                     |      |      |      |      |      |      |      |      |      |      |      |      |      |

> *mmu*PHLPP2 (Reference Sequence: NM\_001122594.2) (Species *Mus musculus*).

Control Amplicon primer F0/R0

ATGTGCCAAGCTGTCTCTGTGCCGAGGTGGGAAGCCAGTACCTCTTTCTA

AAGTCTTCAGCTTGGAGCATGACCC

Targeting Amplicon primer F1/R1

Targeting Amplicon primer F3/R3

CCTGGACAGTGACGATGACCAGCCTGTTGAAGGAGTCATAACCAACGGCAGCAGG  
GTTGAAGTAGAGGTAGACATCCATTGCTGCCGAGGCAGAGAGCCAGAGAGCTCCCC  
TCCGCTCCCGAAGAACTCTTCAAACGCCTGTTTCAGAGGAGCGTGCTAGAGGGGC  
GGTTTGGGATCCGAAGACAGAACAGTGTCAACAGTGGTATACTTCTGCCAGCGAAC  
AGAGACAAGATGGAGCTGCAGAAGTCTCCCTCCAATTCTTGTCTGTATGGAAAGAA  
ACTCTCCAATGGCTCCATTGTGCCCTAGAGGACAGCCTGAACCTCATTGAGGTGGC  
CACAGAAGCACCCAAAAGGAAAAGTGGCTACT

Targeting Amplicon primer F2/R2

Targeting Amplicon primer F4/R4

GAGCCCGAGCCCCGGGGAGAGGAGCGGACAGAGCCCCTGGAGGAGTTTGATACAG  
CACTGTGATTGTACCTCTCGTGTGGACGCAGCCTGAGGGAGGGCTGTGTGGTATTGG  
GGAAGGGACCTTCAGGAGATATTTGCCTCAGTGTTCAAACCATAGATAATATGGAG  
TAGAATTTGGAGCCAAAAAGTTGAGCACTAGCAGGGTCTGGCTCTTGATGGGCTCG  
GACCGCCATCAGTGTTAAGCTTCACATTGGACCTTGGTTGGACTCCAGCGTTGCTG  
GGAGACAGCAGATGTTCTGTGTGTCAGTCCTGCCACCTGCCATTAACCTTTCTCCT  
AGGATCATTGAGAAATTGCCTGCCTGGGCAGGAAAGGGACTATT

### Supplementary Table 5. Related to method section.

Primers used in SELECT.

| Name                              | Sequences (5'-->3')                        |
|-----------------------------------|--------------------------------------------|
| mPHLPP2-m <sup>6</sup> A3675-up   | tagccagtaccgtagtgcgtgCTGAACAGGCGTTGGAAGAG  |
| mPHLPP2-m <sup>6</sup> A3675-down | TCTTCGGGAGCGGAGGGGAGcagaggctgagtcgctgcat   |
| mPHLPP2-m <sup>6</sup> A3733-up   | tagccagtaccgtagtgcgtg CCACTGTTGACACTGTTCTG |
| mPHLPP2-m <sup>6</sup> A3733-down | CTTCGGATCCCAAACCCCGCcagaggctgagtcgctgcat   |
| mPHLPP2-A155-up                   | tagccagtaccgtagtgcgtg GGAACCAAACCTACTTCTTC |
| mPHLPP2-A155-down                 | ATTCAAACAAGTTCTGCTCCcagaggctgagtcgctgcat   |
| qPCR for SELECT-F                 | ATGCAGCGACTCAGCCTCTG                       |
| qPCR for SELECT-R                 | TAGCCAGTACCGTAGTGCGTG                      |

**Supplementary Table 6. Related to method section.**

The shRNA sequences were used in this study as follows:

|                                | sequence                                                                                                                                                           |
|--------------------------------|--------------------------------------------------------------------------------------------------------------------------------------------------------------------|
| METTL14<br>shRNA for<br>NRCM   | F: 5'-CCGGGCTAATGTTGACATTGACTTACTCGAGTAAGTCAATGTCA<br>ACATTAGCTTTTTG-3'<br>R: 5'-AATTCAAAAAGCTAATGTTGACATTGACTTACTCGAGTAAGTC<br>AATGTCAACATTAGC-3'                 |
| METTL14<br>shRNA for<br>murine | F: ggtaccAAGGTATATTGCTGTTGACAGTGAGCGCAGGGCTTCCTATGA<br>TACATCTGCTTAGTGAAGCCACAG<br>R: gaattcCGAGGCAGTAGGCACAGGGCTTCCTATGATACATCTGCTTAC<br>ATCTGTGGCTTCACTAAGCAGATG |
| PHLPP2<br>shRNA for<br>NRCM    | F: 5'-CCGGAGACACCAGCGTCAGAAATATCTCGAGATATTTCTGACG<br>CTGGTGTCTTTTTTG-3'<br>R: 5'-AATTCAAAAAAGACACCAGCGTCAGAAATATCTCGAGATATTT<br>CTGACGCTGGTGTCT-3'                 |

**Supplementary Table 7. Related to method section.**

**The primer sequences used for generation of overexpression constructs were as follows:**

|                               | <b>Forward</b>                                | <b>Reverse</b>                                                                          |
|-------------------------------|-----------------------------------------------|-----------------------------------------------------------------------------------------|
| <b><i>For ratMettl14:</i></b> |                                               |                                                                                         |
| <i>ratMettl14-OE</i>          | ATGAGTTTGGGAGCTGA<br>GAGT                     | CTACCGAGGTGTAAAGCCAC<br>CT                                                              |
| <i>ratMettl14-op</i>          | gctgcaggtcgactctagagATGA<br>GTTTGGGAGCTGAGAGT | gataagcttgatatcgaattCTACCGAG<br>GTGTAAAGCCACCT                                          |
| <b><i>For ratPhlpp2:</i></b>  |                                               |                                                                                         |
| <i>rat-Phlpp2-gene</i>        | F1:<br>CGAGCGTCTCTGTAAAG<br>CCT               | R1:<br>TGATGTTGTTGGCATGTGCG                                                             |
|                               | F2:<br>GCATCCGCAAATAGTCT<br>GGA               | R2:<br>TCACAGTGCTGTATCAA<br>ACT<br>CCTGCA                                               |
| <i>ratPhlpp2-op</i>           | gtggaggtggaggttctagaAGCG<br>TCTCTGTAAAGCCTTG  | R3:<br>TCCAGACTATTTGCGGATGC<br>tcagcggttaaacttaagcttgTCACAG<br>TGCTGTATCAA<br>ACTCCTGCA |

**Supplementary Table 8. Related to method section.**

Antibodies used in this study.

| <b>Antibodies</b>                                                     | <b>Source</b>             | <b>Catalog</b> | <b>lot</b>   | <b>Application</b> |
|-----------------------------------------------------------------------|---------------------------|----------------|--------------|--------------------|
| Rabbit polyclonal anti-ZC3H13                                         | Abcam                     | Cat#ab70802    | GR3235168-28 | Western Blot       |
| Rabbit monoclonal anti-C/EBP $\beta$ [E299]                           | Abcam                     | Cat#ab32358    | GR3232277-8  | Western Blot       |
| Rabbit Polyclonal anti-PHLPP2                                         | ABclonal                  | Cat#A18218     | 1167720201   | Western Blot       |
| Rabbit monoclonal anti-[KO Validated] active + pro Caspase-3[ARC0133] | ABclonal                  | Cat#A19654     | 4001330002   | Western Blot       |
| Rabbit monoclonal anti-Caspase-3 p12[ARC0143]                         | ABclonal                  | Cat#A19664     | 4000000143   | Western Blot       |
| Rabbit monoclonal anti-Bcl-2[ARC0173]                                 | ABclonal                  | Cat#A19693     | 4000000173   | Western Blot       |
| Rabbit polyclonal anti-[KO Validated] Bax                             | ABclonal                  | Cat#A12009     | 5500008806   | Western Blot       |
| Rabbit polyclonal anti-PHLPP1                                         | ABclonal                  | Cat#A9542      | 3521609005   | Western Blot       |
| Rabbit polyclonal anti-RBM15B                                         | ABclonal                  | Cat#A9873      | 0051800201   | Western Blot       |
| Rabbit monoclonal anti-FOXO3A [75D8]                                  | Beyotime Biotechnology    | Cat#AF609      | 031221210930 | Western Blot       |
| Rabbit polyclonal Phospho-FoxO3a (Ser253) Antibody                    | Cell Signaling Technology | Cat #9466      | 6            | Western Blot       |
| Rabbit polyclonal GAPDH                                               | Bioworld Technology       | Cat#AP0063     | 01201908     | Western Blot       |
| Rabbit monoclonal anti-METTL14 [D8K8W]                                | Cell Signaling Technology | Cat#51104      | 1            | Western Blot       |
| Rabbit monoclonal anti-METTL3 [D2I6O]                                 | Cell Signaling Technology | Cat#96391      | 1            | Western Blot       |
| Rabbit monoclonal                                                     | Cell Signaling            | Cat#4060       | 38           | Western Blot       |

|                                                                 |                           |                |                |                    |
|-----------------------------------------------------------------|---------------------------|----------------|----------------|--------------------|
| anti-Phospho-Akt (Ser473) [D9E] XP                              | Technology                |                |                |                    |
| Rabbit monoclonal anti-Phospho-Akt (Thr308)[D25E6]XP            | Cell Signaling Technology | Cat#13038      | 18             | Western Blot       |
| Rabbit monoclonal anti-FTO [D2V1I]                              | Cell Signaling Technology | Cat#45980      | 1              | Western Blot       |
| Rabbit monoclonal anti-ALKBH5 [E5Y7C]                           | Cell Signaling Technology | Cat#80283      | 1              | Western Blot       |
| Rabbit monoclonal anti-Phospho-Akt2 (Ser474) [D3H2]             | Cell Signaling Technology | Cat#8599       | 2              | Western Blot       |
| Mouse monoclonal anti-Akt2 [L79B2]                              | Cell Signaling Technology | Cat#5239       | 4              | Western Blot       |
| Rabbit monoclonal anti-Phospho-GSK-3 $\beta$ (Ser9) [D85E12] XP | Cell Signaling Technology | Cat#5558       | 10             | Western Blot       |
| Rabbit monoclonal anti-GSK-3 $\beta$ [D5C5Z] XP                 | Cell Signaling Technology | Cat#12456      | 8              | Western Blot       |
| Rabbit monoclonal anti-PI3 Kinase p110 $\alpha$ [C73F8]         | Cell Signaling Technology | Cat#4249       | 11             | Western Blot       |
| Rabbit Polyclonal WTAP polyclonal antibody                      | Proteintech               | Cat#10200-1-AP | 00048586       | Western Blot       |
| Rabbit Polyclonal AKT polyclonal antibody                       | Proteintech               | Cat#10176-2-AP | 00099352       | Western Blot       |
| Mouse Monoclonal Beta Actin antibody[2D4H5]                     | Proteintech               | Cat#66009-1-Ig | 10004156       | Western Blot       |
| Rabbit polyclonal IGF-1 antibody                                | Proteintech               | Cat#28530-1-AP | 00085177       | Western Blot       |
| Rabbit Polyclonal Phospho-Histone H3 (Ser10) antibody           | Thermo Fisher Scientific  | Cat#PA5-17869  | WC3216175<br>A | Immunofluorescence |
| Rabbit monoclonal Ki67 antibody [SP6]                           | Abcam                     | Cat#ab16667    | GR3375640-18   | Immunofluorescence |
| Monoclonal Anti-alpha-Actinin [EA-53] (Sarcomeric)              | Sigma-Aldrich             | Cat#A7811      | 0000120831     | Immunofluorescence |

|                                                                |                             |                 |            |                     |
|----------------------------------------------------------------|-----------------------------|-----------------|------------|---------------------|
| antibody                                                       |                             |                 |            |                     |
| Cy3 AffiniPure Donkey Anti-Mouse IgG (H+L)                     | Jackson ImmunoResearch Labs | Cat#715-165-151 | 155867     | Immunofluorescence  |
| Alexa Fluor 488-conjugated Affinipure Goat Anti-Mouse IgG(H+L) | Jackson ImmunoResearch Labs | Cat#115-545-003 | 158218     | Immunofluorescence  |
| Alexa Fluor 488-AffiniPure Goat Anti-Rabbit IgG (H+L) antibody | Jackson ImmunoResearch Labs | Cat#111-545-003 | 146644     | Immunofluorescence  |
| Anti-m6A antibody                                              | Synaptic Systems            | Cat#202 003     | 2-125      | Immunoprecipitation |
| Rabbit polyclonal anti-YTHDF1                                  | Proteintech                 | Cat#17479-1-AP  | 00102690   | Immunoprecipitation |
| Normal Rabbit-IgG                                              | Sigma-Aldrich               | Cat#NI01        | 3238429    | Immunoprecipitation |
| Rabbit polyclonal anti-METTLL14                                | ABclonal                    | Cat#A8530       | 5500003462 | Immunoprecipitation |



**Supplementary Table 9. Related to method section.**

***mmu*PHLPP2-WT-pGL3**

Cloning vector (Insert site): pGL3-Basic(gccgtg/taattc)

>*mmu*PHLPP2-WT-pGL3

GGAGGCGGGCGGAAGCTCTGACAATGGCCTGGACAGTGACGATGACCAGCCTGTTG  
AAGGAGTCATAACCAACGGCAGCAGGGTTGAAGTAGAGGTAGACATCCATTGCTGC  
CGAGGCAGAGAGCCAGAGAGCTCCCCTCCGCTCCCGAAGAAGTCTTCCAACGCCTG  
TTCAGAGGAGCGTGCTAGAGGGGCGGGGTTGGGATCCGAAGACAGAACAGTGTC  
AACAGTGGTATACTTCTGCCAGCGAACAGAGACAAGATGGAGCTGCAGAAGTCTCC  
CTCCACTTCTGTCTGTATGGAAAGAACTCTCCAATGGCTCCATTGTGCCCTAGA  
GGACAGCCTGAACCTCATTGAGGTGGCCACAGAAGCACCCAAAAGGAAAAGTGGC  
TACTTTGCTGCCCCACTCAGCTGGAACCAGAGGATCAGTTTGTCTGCCCTCGAGAC  
CTGGAAGAGGAAGTGAAGGAGCAGATGAAGCAGCACCAGGAGGGCAGGCCTGAG  
CCCGAGCCCCGGGGAGAGGAGCGGACAGAGCCCCTGGAGGAGTTTGATAACAGCAC  
TGTGATTGTACCTCTCGTGTGGACGCAGCCTGAGGGAGGGCTGTGTGGTATTGGGG  
AAGGGACCTTCAGGAGATATTTGCCTCAGTGTTTCAAACCATAGATAATATGGAGTA  
GAATTTGGAGCCAAAAGTTGAGCACTAGCAGGGTCTGGCTCTTGATGGGCTCGGA  
CCGCCATCAGTGTTAAGCTTCACATTGGACCTTGGTTGGACTCCCAGCGTTGCTGGG  
AGACAGCAGATGTTCTGTGTCAGTCCTGCCACCTGCCATTAACCCTTCTCTCCTAG  
GATCATTTGAGAAATTGCCTGCCTGGGCAGGAAAGGGACTATTTCTGTGGAGGAAG  
TAACTGAAGGTTGATTCCCTTTACTAATTGCTGCTGATGGATCTCTGTGACAAGAGA  
AATCACCTTATCTCTCAGACTAACTAGTGGGATGTGATGTGACTAGTCACATGGCTTT  
TTATTCTCTAGGAGAATACAGCCTATCAAATGTCTA

***mmu*PHLPP2-mut-pGL3**

Cloning vector (Insert site): pGL3-Basic(gccgtg/taattc)

>*mmu*PHLPP2-mut-pGL3

GGAGGCGGGCGGAAGCTCTGACAATGGCCTGGTCAGTGACGATGACCAGCCTGTTGA  
AGGAGTCATAACCAACGGCAGCAGGGTTGAAGTAGAGGTAGTCATCCATTGCTGCC  
GAGGCAGAGAGCCAGAGAGCTCCCCTCCGCTCCCGAAGATCTTCCAACGCCTGT  
TCAGAGGAGCGTGCTAGAGGGGCGGGGTTGGGATCCGAAGTCAGATCAGTGTCAA  
CAGTGGTATACTTCTGCCAGCGATCAGAGTCAAGATGGAGCTGCAGAAGTCTCCCTC  
CACTTCTTGTCTGTATGGAAAGAATCTCTCCAATGGCTCCATTGTGCCCTAGAGGT  
AGCCTGATCCTCATTGAGGTGGCCACAGAAGCACCCAAAAGGAAATCTGGCTACTT  
TGCTGCCCCACTCAGCTGGATCCAGAGGATCAGTTTGTCTGCCCTCGAGTCCTGGA  
AGAGGAAGTGAAGGAGCAGATGAAGCAGCACCAGGAGGGCAGGCCTGAGCCCGA  
GCCCCGGGGAGAGGAGCGGTCAGAGCCCCTGGAGGAGTTTGATAACAGCACTGTGAT  
TGTACCTCTCGTGTGGACGCAGCCTGAGGGAGGGCTGTGTGGTATTGGGGAAGGGT  
CCTTCAGGAGATATTTGCCTCAGTGTTTCAATCCATAGATAATATGGAGTAGAATTTG  
GAGCCAAAAGTTGAGCACTAGCAGGGTCTGGCTCTTGATGGGCTCGGTCCGCCAT  
CAGTGTTAAGCTTCACATTGGTCCTTGGTTGGTCTCCCAGCGTTGCTGGGAGTCAGC  
AGATGTTCTGTGTCAGTCCTGCCACCTGCCATTAACCCTTCTCTCCTAGGATCATTT  
GAGAAATTGCCTGCCTGGGCAGGAAAGGGTCTATTTCTGTGGAGGAAGTAACTGAA  
GGTTGATTCCCTTTACTAATTGCTGCTGATGGATCTCTGTGACAAGAGAAATCACCTT

ATCTCTCAGTCTAACTAGTGGGATGTGATGTGACTAGTCACATGGCTTTTTATTCTCT  
AGGAGAATACAGCCTATCAAATGTCTA

***mmu*PHLPP1-WT-pGL3**

Cloning vector (Insert site): pGL3-Basic(gccgtg/taattc)

>*mmu*PHLPP1-WT-pGL3

GGAGGCGGCGGAAGCGGCATGGCATCTGAGATCAGCAGTGAAGTGTCTACCTCCGA  
GATGAGTAGTGAGGTGGGCTCCACAGCCTCTGATGAGCCCCGTCTGGAGTCCTGA  
ATGAGAGCAGCCCTGCCTACCCCAACGAGCAGCGCTGCATGCTCCACCCTGTCTGC  
CTGTCTAACTCCTTCCAACGTCAGCTGTCCAGCGCTACTTTCTCCAGCGCGTTCTCT  
GACAACGGCCTTGACAGTGACGATGAAGAACCATTGAGGGGGTGTTCAGCAACG  
GCAGCCGGGTTGAGGTGGAAGTAGACATCCACTGCAGCAGGGCCAAGGAAAAGGA  
GAGACAGCAGCACCTACTTCAGGTGCCAGCTGAGGCCAGTGATGAGGGCATTGTCA  
TCAGTGCCAATGAGGATGAGTCAGGTCTGTCCAAGAAGGCAGACTTTTCTGCTGTG  
GGAACCATTGGACGACGCAGGGCTAATGGCTCTGTAGCTCCCCAGGAAAGGAGCCA  
TAATGTGATAGAGGTTGCTGCAGATGCGCCTCTCCGGAAGCCAGGAGGCTATTTTGC  
AGCCCCTGCTCAGCCAGATCCAGATGATCAGTTTATCATCCCCCAGAGCTGGAAGA  
GGAAGTCAAAGAAATCATGAAACATCACCAGGAGCAGCAGCAGCAGCAGCAGCAG  
CAGCAGCTGCCACCACCACCCAGCCGCCACAGCCACAGCCACAGCCACAGCCAC  
AGCCACAGCCACAGCCACAGCGGCACTTCCAAATGGATCACCTGCCAGACTGTTAC  
GATACACCGCTATGACCCAGCCTGAGTACTGTTTTAAACAATAAACTAACCAGAGAG  
ACTGAGAGTCTCCCAGGCTCACATTAACCAGGGGTGTTAACTTCATGCCCTCTCCC  
AGACACTGCCCCACCTGTCTCTGCAGCTCATCTGTAGGTTCTCTTTGTATTGGTTACT  
TTTAACAATTAACCACTTTTCTTCTAGTGATACTTTACCAATATGATTTAAATGTGCAG  
ATAATGTGGCCCTGTTCTCGGGAACCCAGAACCTTTTACAGACATTTTTTAATTGTGT  
TCCTTCCTGCTGCCACAATCAGCATGACTGTATAGAGTCCCTTATAACCATCTACACAT  
CCAGAGTTATATGGAAGCAGAATGCC

***mmu*PHLPP1-mut-pGL3**

Cloning vector (Insert site): pGL3-Basic(gccgtg/taattc)

>*mmu*PHLPP1-mut-pGL3

GGAGGCGGCGGAAGCGGCATGGCATCTGAGATCAGCAGTGTCTGTCTACCTCCGA  
GATGAGTAGTGAGGTGGGCTCCACAGCCTCTGATGAGCCCCGTCTGGAGTCCTGA  
ATGAGAGCAGCCCTGCCTACCCCAACGAGCAGCGCTGCATGCTCCACCCTGTCTGC  
CTGTCTAACTCCTTCCAACGTCAGCTGTCCAGCGCTACTTTCTCCAGCGCGTTCTCT  
GACAACGGCCTTGACAGTGACGATGAAGATCCATTGAGGGGGTGTTCAGCAACG  
CAGCCGGGTTGAGGTGGAAGTAGTCATCCACTGCAGCAGGGCCAAGGAAAAGGAG  
AGTCAGCAGCACCTACTTCAGGTGCCAGCTGAGGCCAGTGATGAGGGCATTGTCA  
CAGTGCCAATGAGGATGAGTCAGGTCTGTCCAAGAAGGCAGTCTTTTCTGCTGTGG  
GAACCATTGGACGACGCAGGGCTAATGGCTCTGTAGCTCCCCTGGAAAGGAGCCAT  
AATGTGATAGAGGTTGCTGCAGATGCGCCTCTCCGGAAGCCAGGAGGCTATTTTGC  
GCCCCTGCTCAGCCAGATCCAGATGATCAGTTTATCATCCCCCAGAGCTGGAAGAG  
GAAGTCAAAGAAATCATGAATCATCACCAGGAGCAGCAGCAGCAGCAGCAGCAGC  
AGCAGCTGCCACCACCACCCAGCCGCCACAGCCACAGCCACAGCCACAGCCACA  
GCCACAGCCACAGCCACAGCGGCACTTCCAAATGGATCACCTGCCAGTCTGTTACG  
ATACACCGCTATGACCCAGCCTGAGTACTGTTTTAATCAATAATCTAACCAGAGAGTC

TGAGAGTCTCCCAGGCTCACATTAATCCAGGGGTGTTAACTTCATGCCCTCTCCCAG  
TCACTGCCCCACCTGTCTCTGCAGCTCATCTGTAGGTTCTCTTTGTATTGGTTACTTTT  
ACAATTAACCACTTTTCTTCTAGTGATACTTTACCAATATGATTTAAATGTGCAGATA  
ATGTGGCCCTGTTCTCGGGATCCCAGATCCTTTTACAGTCATTTTTTAATTGTGTTCTT  
TCCTGCTGCCACAATCAGCATGACTGTATAGAGTCCCTTATACCATCTACACATCCAG  
AGTTATATGGAAGCAGAATGCC

***Rattus* PHLPP2-WT-pGL3**

Cloning vector (Insert site): pGL3-Basic(gccgtg/taattc)

>*Rattus* PHLPP2-WT-pGL3

GGAGGCGGCGGAAGCTCTGACAATGGACTGGACAGTGACGATGACCAGCCTGTTG  
AAGGCGTCATAACCAATGGCAGCAGGGTTGAGGTAGAGGTAGACATTCATTGCTGC  
CGAGGCAGAGAGTCTGAGAACTCCCCTACTCTCCCGAAGAATTCTTCCCTACCCCTGT  
TCAGAGGAACATGCTAGGGGGTTGGGTTTTGGGATCCGAAGACAGAACAGTGTGAA  
TAGTGGTATACTTCTGCCAGTGAACAAAGACAAGATGGAGTTACAGAAGTCTCCCTC  
CACTTCTTGTGTTGTATGGAAAGAACTCTCCAATGGCTCCATTGTGCCCTAGAAGA  
CAGCCTGAACCTCATTGAGGTGGCCACAGAAGCACCCAAGAGGAAAAGTGGCTATT  
TTGCTGCCCCACTCAGCTGGAACCAGAGGATCAATTTGTTGTCCCCCGTGACCTGG  
AAGACGAAGTGAAGGAGCAAATGAAGCAGCACCAGGAGAGCAGGCCTGAGCCTG  
AACCCAGGGAAGAGGACCGGACAGAGCCCCTGCAGGAGTTTGATACAGCACTGTG  
A

***Rattus* PHLPP2-mut-pGL3**

Cloning vector (Insert site): pGL3-Basic(gccgtg/taattc)

>*Rattus* PHLPP2-mut-pGL3

GGAGGCGGCGGAAGCTCTGACAATGGTCTGGTCAGTGACGATGACCAGCCTGTTGA  
AGGCGTCATAACCAATGGCAGCAGGGTTGAGGTAGAGGTAGTCATTCATTGCTGCCG  
AGGCAGAGAGTCTGAGATCTCCCCTACTCTCCCGAAGAATTCTTCCCTACCCCTGTTC  
AGAGGATCATGCTAGGGGGTTGGGTTTTGGGATCCGAAGTCAGATCAGTGTGAATAG  
TGGTATACTTCTGCCAGTGATCAAAGTCAAGATGGAGTTACAGAAGTCTCCCTCCAC  
TTCTTGTTTGTATGGAAAGAATCTCTCCAATGGCTCCATTGTGCCCTAGAAGTCAGC  
CTGATCCTCATTGAGGTGGCCACAGAAGCACCCAAGAGGAAATCTGGCTATTTTGTCT  
GCCCCACTCAGCTGGAACCAGAGGATCAATTTGTTGTCCCCCGTGACCTGGAAGA  
CGAAGTGAAGGAGCAAATGAAGCAGCACCAGGAGAGCAGGCCTGAGCCTGATCCC  
AGGGAAGAGGTCCGGTCAGAGCCCCTGCAGGAGTTTGATACAGCACTGTGA

## Supplementary Figures

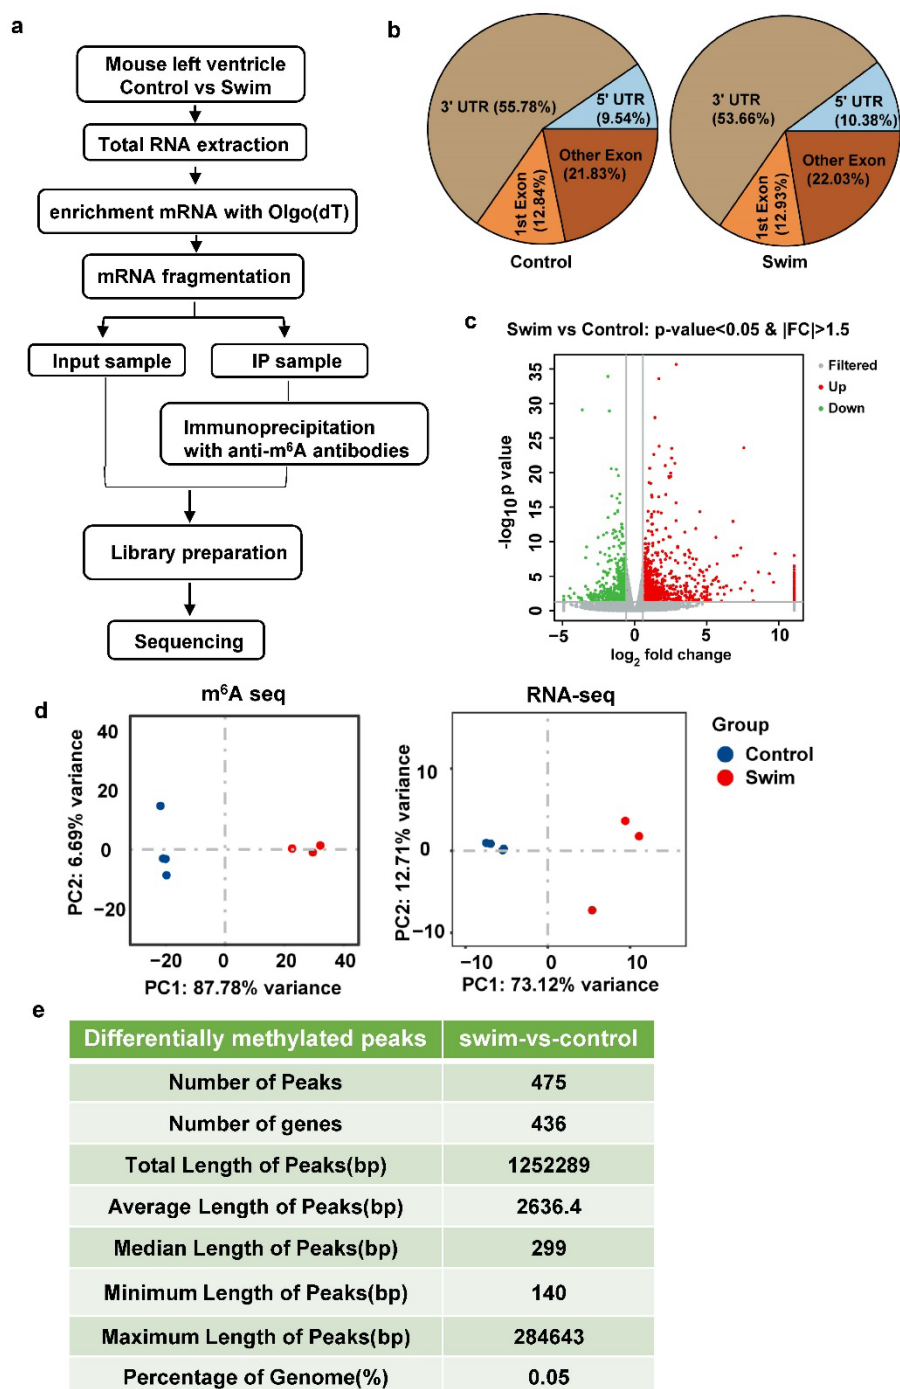

**Supplementary Fig. 1: Identifying m<sup>6</sup>A RNA methylome of the exercised murine hearts by MeRIP-seq and RNA-seq.** (a) Diagram of meRIP-seq experiment. (b) Pie charts showing the distribution of m<sup>6</sup>A RNA methylation in the swim and control murine hearts, respectively. (c) Volcano plot of the RNA-seq. Transcripts with significantly increased peak (red) and decreased peak (green) changes are highlighted ( $p\text{-value} < 0.05$ , fold change  $> 1.5$ ). Negative binomial test (two-sided). (d) PCA plots of MeRIP-seq and RNA-seq. (e) Statistics of the differential methylation peaks which were detected by meRIP in the swim and control hearts. Seq, sequencing. IP, immunoprecipitation.

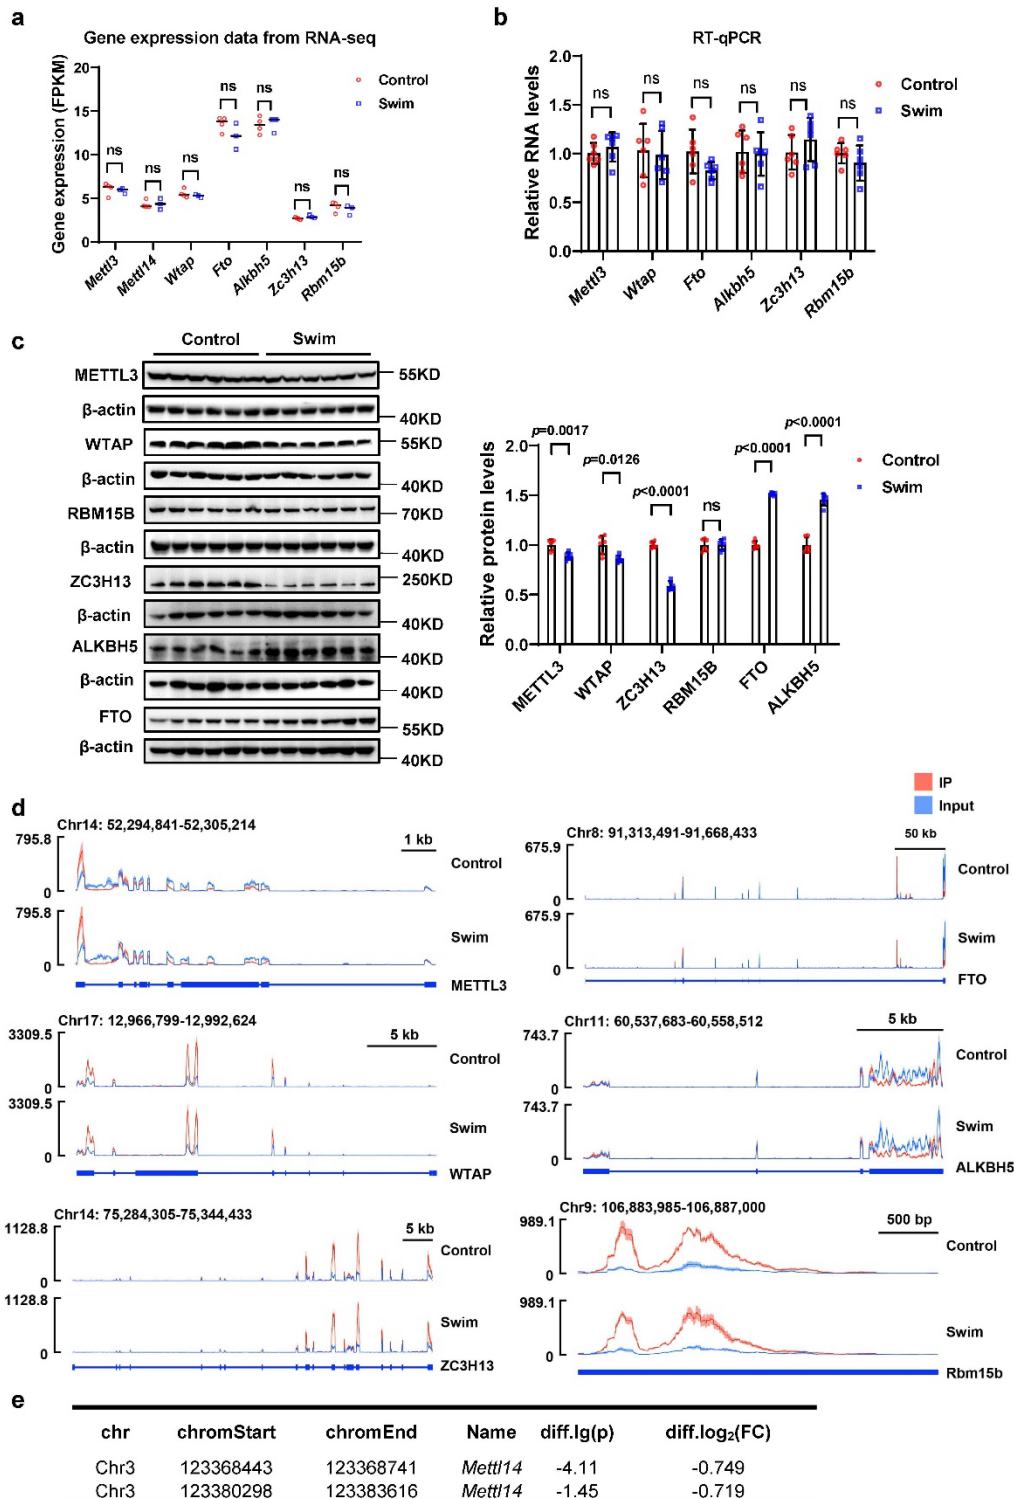

**Supplementary Fig. 2: The regulation of m<sup>6</sup>A effectors in response to exercise.** (a) Gene expression data of m<sup>6</sup>A effectors (METTL3, METTL14, WTAP, FTO, ALKBH5, ZC3H13, and RBM15B) from RNA-seq (n=4:3 independent biological samples). (b) qPCR analysis of *Mettl3*, *Wtap*, *Fto*, *Alkbh5*, *Zc3h13*, and *Rbm15b* mRNA expression levels in the hearts with or without swim training (n=6 mice/group). (c) Representative western blot and statistical data displaying the knockdown of m<sup>6</sup>A effectors (METTL3, WTAP, FTO, ALKBH5, ZC3H13, and

RBM15B) in whole lysates isolated from the hearts of swim and control murine (n=6 mice/group). **(d)** Integrative genomics viewer (IGV) tracks revealing the results of meRIP-seq (Red) and RNA-seq (Blue) reads distributions in *Mettl3*, *Wtap*, *Fto*, *Alkbh5*, *Zc3h13*, and *Rbm15b* mRNA of the swim and control. Seq, sequencing. **(e)** m<sup>6</sup>A peaks on *Mettl14* mRNA in the hearts with or without swim training determined using meRIP-seq. IP, immunoprecipitation. RT-qPCR, quantitative reverse transcription polymerase chain reaction. ns, nonstatistically significant. All data are expressed as means  $\pm$  SD. **(b** and **c**, independent-sample t-test, two-sided.) Source data are provided as a Source Data file.

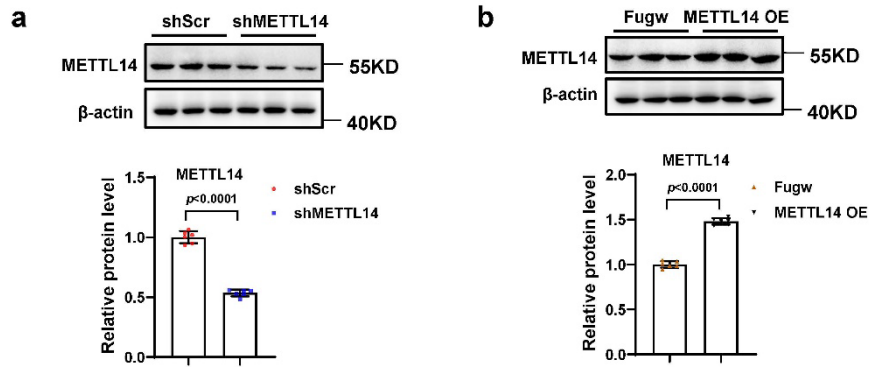

**Supplementary Fig. 3: Overexpression and inhibition of METTL14 in NRCMs.** (a) Representative western blot and statistical data displaying the knockdown of METTL14 in NRCMs by shMETTL14 (n=6 wells/group). (b) Representative western blot and statistical data displaying the overexpression of METTL14 in NRCMs via transfecting with METTL14 overexpression construct (n=6 wells/group). NRCM, neonatal rat cardiomyocyte. Fugw, control without METTL14 overexpression; METTL14 OE, METTL14 overexpression; shScr, Scramble short hairpin RNA; shMETTL14, METTL14 short hairpin RNA to knockdown METTL14. All data are expressed as means  $\pm$  SD. (a and b, independent-sample t-test, two-sided.) Source data are provided as a Source Data file.

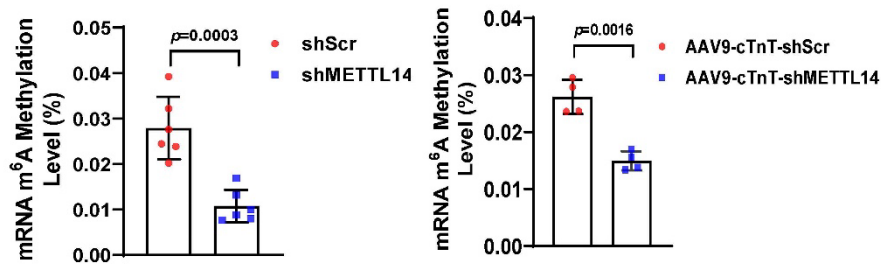

**Supplementary Fig. 4: METTL14 inhibition reduces the mRNA m<sup>6</sup>A level in NRCM.** The relative mRNA m<sup>6</sup>A level with or without METTL14 knockdown in NRCM (n=6 /group) or mice hearts (n=4 /group). NRCM, neonatal rat cardiomyocyte. shScr, Scramble short hairpin RNA; shMETTL14, METTL14 short hairpin RNA to knockdown METTL14; AAV9-cTnT-shScr, cardiac-specific troponin-T promoter-driven Scramble AAV9; AAV9-cTnT-shMETTL14, cardiac-specific troponin-T promoter-driven METTL14 knockdown AAV9. All data are expressed as means  $\pm$  SD. (Independent-sample t-test, two-sided.) Source data are provided as a Source Data file.



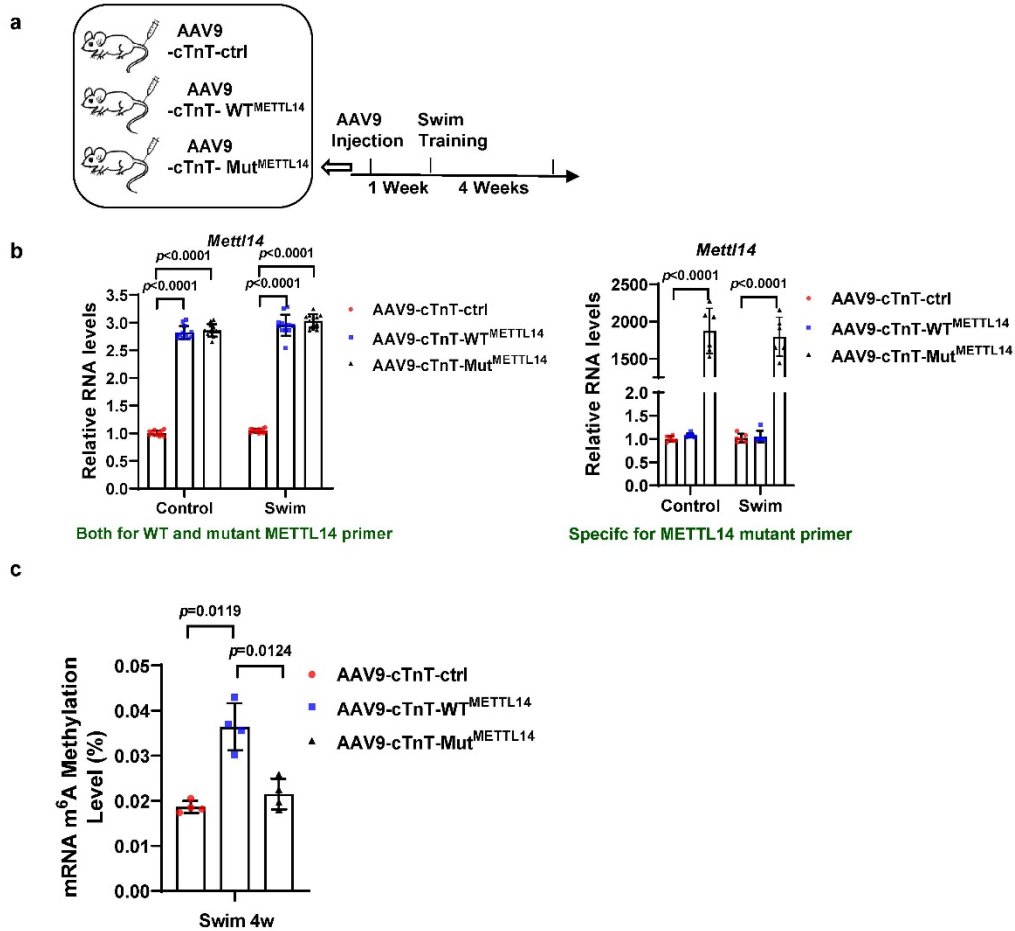

**Supplementary Fig. 5: Mutant METTL14 abolishes the cardiac m<sup>6</sup>A methylation elevation after swimming training.** (a) The schedule of virus injection and swim-induced mice physiological cardiac hypertrophy model establishment. WT<sup>METTL14</sup>, wild -type METTL14 overexpression. Mut<sup>METTL14</sup>, METTL14 R254/R255A-R298P-D312A mutant overexpression. (b) qPCR analysis of *Mettl14* mRNA expression levels in mice hearts treated as indicated groups. Left panel, primer, which was used to PCR, for both WT and mutant METTL14 (n=12 /group). Right panel, primer, which was used to PCR, specific for mutant METTL14 (n=6 /group). (c) The relative mRNA m<sup>6</sup>A level in hearts treated as indicated (n=4 /group). AAV9-cTnT-ctrl, cardiac-specific troponin-T promoter-driven control AAV9; AAV9-cTnT-WT<sup>METTL14</sup>, cardiac-specific troponin-T promoter-driven wild-type METTL14 overexpression AAV9; AAV9-cTnT- Mut<sup>METTL14</sup>, cardiac-specific troponin-T promoter-driven METTL14 R254/R255A-R298P-D312A mutant overexpression AAV9. All data are expressed as means ± SD. (b, two-way ANOVA followed by Tukey's post hoc test; c, one-way ANOVA followed by Bonferroni test.) Source data are provided as a Source Data file.

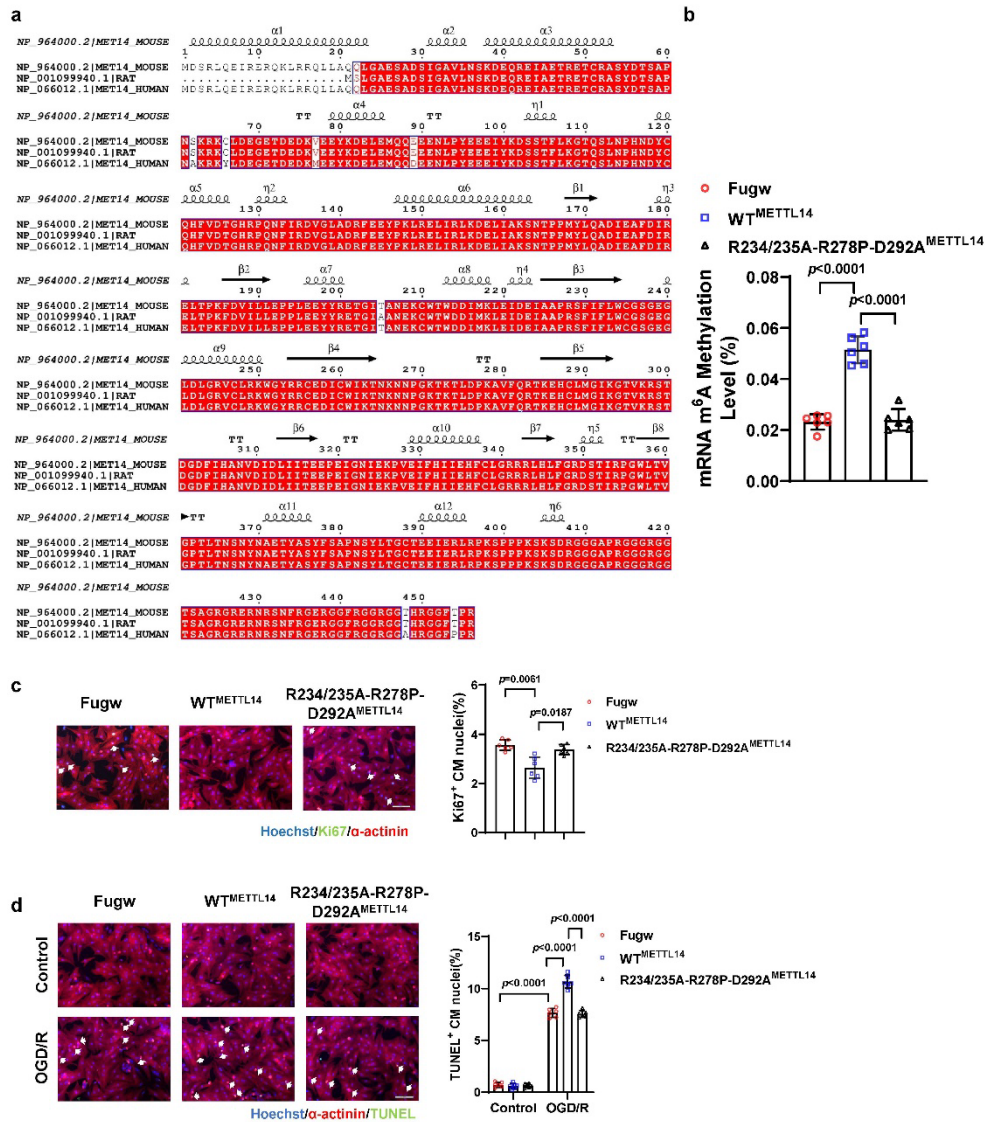

**Supplementary Fig. 6: The pro-apoptosis and antiproliferative effects of WT<sup>METTL14</sup> overexpression on NRCM are disrupted by mut<sup>METTL14</sup> overexpression.** (a) Protein alignment of METTL14 across mammalian species. Protein alignment was generated by CLUSTALW and ESPrpt 3.0. PDB file of murine METTL14 was download from AlphaFold Protein Structure Database. (b) The relative mRNA m<sup>6</sup>A level in NRCM treated as indicated (n=6 /group). (c) Representative images of immunofluorescence staining and quantification of the Ki67 positive cardiomyocytes treated as indicated (n=6 wells/group). Scale bar: 100 μm. (d) Representative images of immunofluorescence staining and quantification of the TUNEL positive cardiomyocytes treated as indicated (n=6 wells/group). Scale bar: 100 μm. NRCM, neonatal rat cardiomyocyte. OGD/R, oxygen-glucose deprivation/reperfusion. Fugw, control without METTL14 overexpression; WT<sup>METTL14</sup>, NRCM treated with wild-type METTL14 overexpression; R234/235A-R278P-D292A<sup>METTL14</sup>, NRCM treated with METTL14 mutant overexpression. All data are expressed as means ± SD. (b, one-way ANOVA followed by Bonferroni test; c, one-way ANOVA followed by Dunnett T3 test; d, two-way ANOVA followed by Tukey's post hoc test.) Source data are provided as a Source Data file.

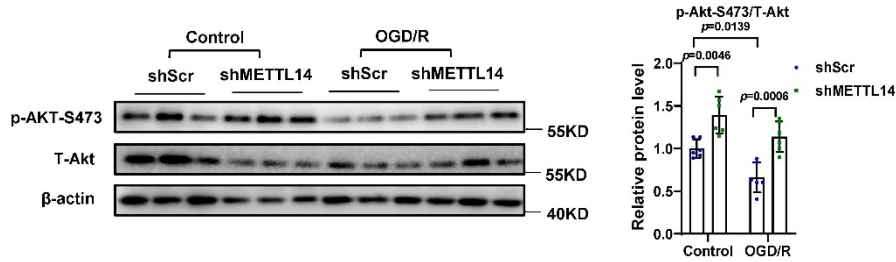

**Supplementary Fig. 7: The activation of Akt-S473 presented in OGD/R treated NRCM is regulated by METTL14.** Representative western blot and statistical data of the phosphorylation levels of Akt-S473 in OGD/R induced NRCM apoptosis model treated with shMETTL14 or scrambled control (n=6 wells/group). NRCM, neonatal rat cardiomyocyte. shScr, Scramble short hairpin RNA; shMETTL14, METTL14 short hairpin RNA to knockdown METTL14; OGD/R, oxygen-glucose deprivation/reperfusion. All data are expressed as means  $\pm$  SD. (Two-way ANOVA followed by Tukey's post hoc test.) Source data are provided as a Source Data file.

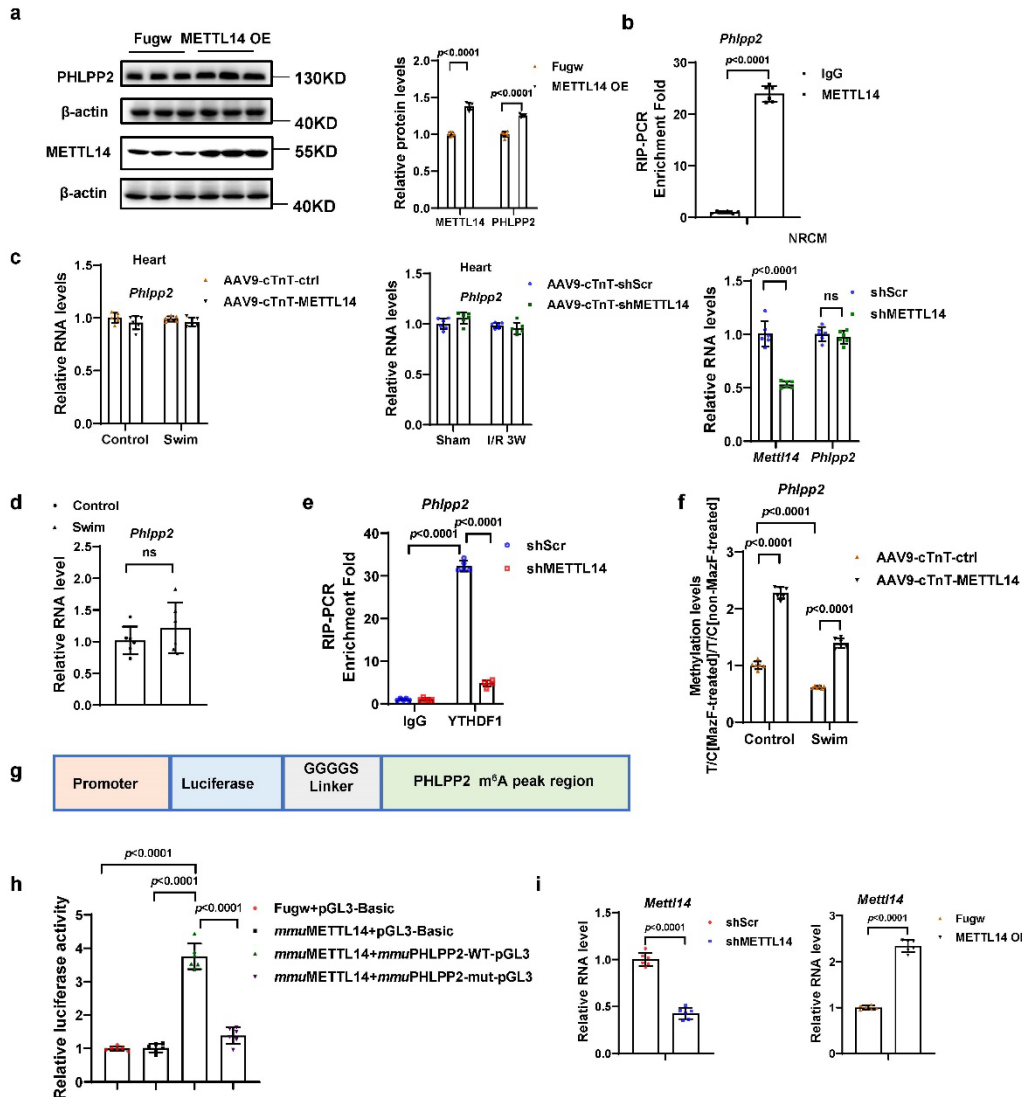

**Supplementary Fig. 8: The regulation of METTL14 on PHLPP2.** (a) Western blot analyses of PHLPP2 and METTL14 in NRCM with or without METTL14 overexpression (n=6 wells/group). (b) Validation of *Phlpp2* mRNA binding to METTL14 in H9C2 cardiomyocytes using RIP-qPCR (n=6/group). (c) qPCR analysis of *Phlpp2* mRNA expression levels in the hearts or NRCM treated as indicated (n=6 mice or wells/group). (d) qPCR analysis of *Phlpp2* mRNA expression levels in the hearts with or without swimming training (n=6 mice/group). (e) The binding of *Phlpp2* mRNA to YTHDF1 in H9C2 cardiomyocytes with or without METTL14 knockdown (n=5/group). (f) The methylation levels of *Phlpp2* mRNA in mice hearts treated as indicated measured by MazF-qPCR (n=6 mice/group). (g) Scheme of WT-PHLPP2 or Mut-PHLPP2 luciferase reporter gene. (h) Relative luciferase activity of mouse PHLPP2 wild type (PHLPP2-WT-pGL3) or m<sup>6</sup>A mutant (PHLPP2-mut-pGL3) reporter gene with or without mouse METTL14 overexpression (n=6/group). (i) qPCR analysis of *Mettl14* expression with METTL14 overexpression or knockdown, related to MazF-qPCR in Fig. 7k (n=6/group). NRCM, neonatal rat cardiomyocyte; RIP, RNA immunoprecipitation assay; Fugw, control without METTL14 overexpression; METTL14 OE, METTL14 overexpression; shScr, Scramble short hairpin RNA; shMETTL14, METTL14 short hairpin RNA to knockdown METTL14; AAV9-cTnT-ctrl, cardiac-specific troponin-T promoter-driven

control AAV9; AAV9-cTnT-METTL14, cardiac-specific troponin-T promoter-driven METTL14 overexpression AAV9; AAV9-cTnT-shScr, cardiac-specific troponin-T promoter-driven Scramble AAV9; AAV9-cTnT-shMETTL14, cardiac-specific troponin-T promoter-driven METTL14 knockdown AAV9. ns, nonstatistically significant. All data are expressed as means  $\pm$  SD. (**a-b**, **d**, and **i**, independent-sample t-test, two-sided; **c**, **e-f**, two-way ANOVA followed by Tukey's post hoc test; **h**, one-way ANOVA followed by Dunnett T3 test.) Source data are provided as a Source Data file.

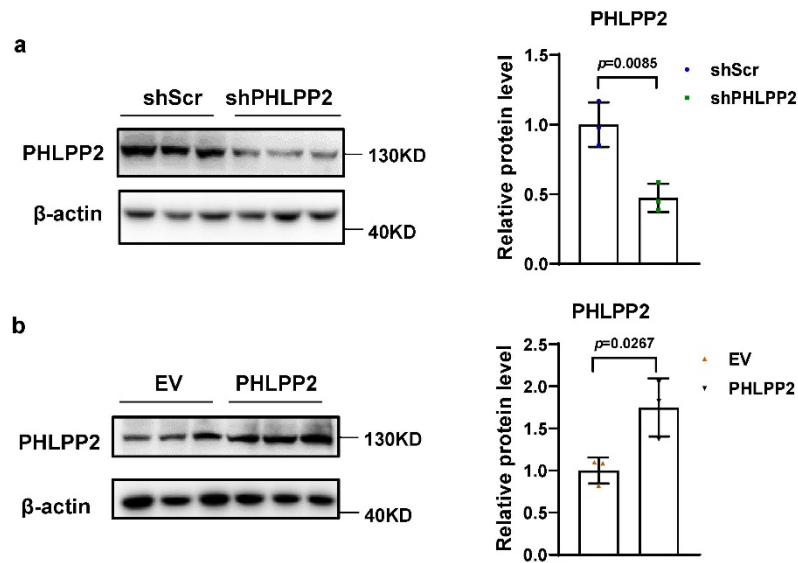

**Supplementary Fig. 9: Overexpression and inhibition of PHLPP2 in NRCMs.** (a) Representative western blot and statistical data displaying the knockdown of PHLPP2 in NRCMs by shPHLPP2 (n=3 wells/group). (b) Representative western blot and statistical data displaying the overexpression of PHLPP2 in NRCMs via transfecting with PHLPP2 overexpression construct (n=3 wells/group). NRCM, neonatal rat cardiomyocyte. EV, Empty vector without PHLPP2 overexpression; PHLPP2, PHLPP2 overexpression; shScr, Scramble short hairpin RNA; shPHLPP2, PHLPP2 short hairpin RNA to knockdown PHLPP2. All data are expressed as means  $\pm$  SD. (a and b, independent-sample t-test, two-sided.) Source data are provided as a Source Data file.

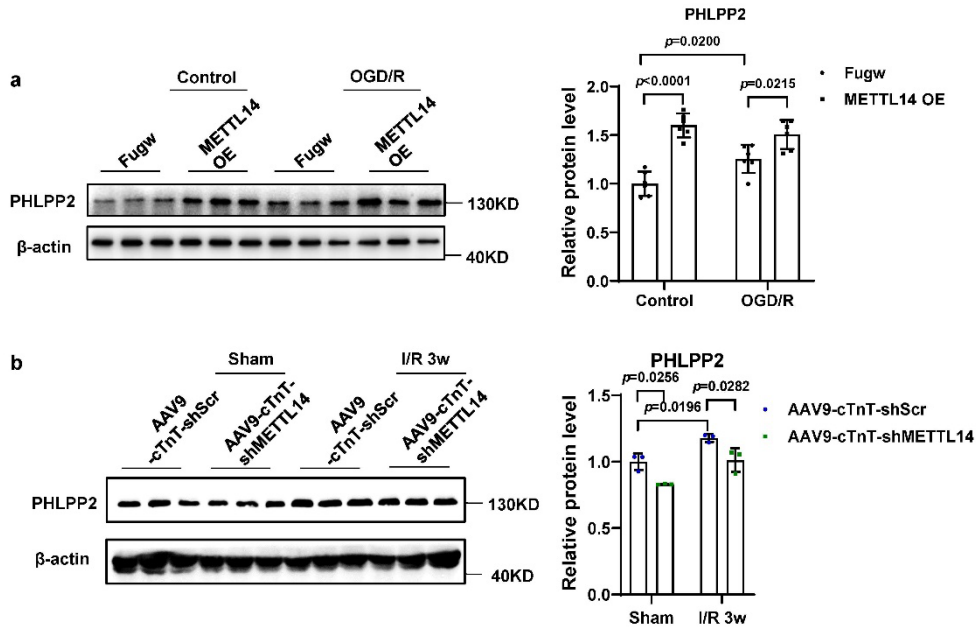

**Supplementary Fig. 10: The expression of PHLPP2 were positively regulated by METTL14.** (a) Representative western blot and statistical data of PHLPP2 expression levels in the NRCMs treated as indicated (n=6 wells /group). (b) Representative western blot and statistical data of PHLPP2 expression levels in the mice hearts treated as indicated (n=3 mice/group). NRCM, neonatal rat cardiomyocyte; OGD/R, oxygen-glucose deprivation/reperfusion; Fugw, control without METTL14 overexpression; METTL14 OE, METTL14 overexpression; AAV9-cTnT-shScr, cardiac-specific troponin-T promoter-driven Scramble AAV9; AAV9-cTnT-shMETTL14, cardiac-specific troponin-T promoter-driven METTL14 knockdown AAV9. All data are expressed as means  $\pm$  SD. (a and b, Two-way ANOVA followed by Tukey's post hoc test.) Source data are provided as a Source Data file.

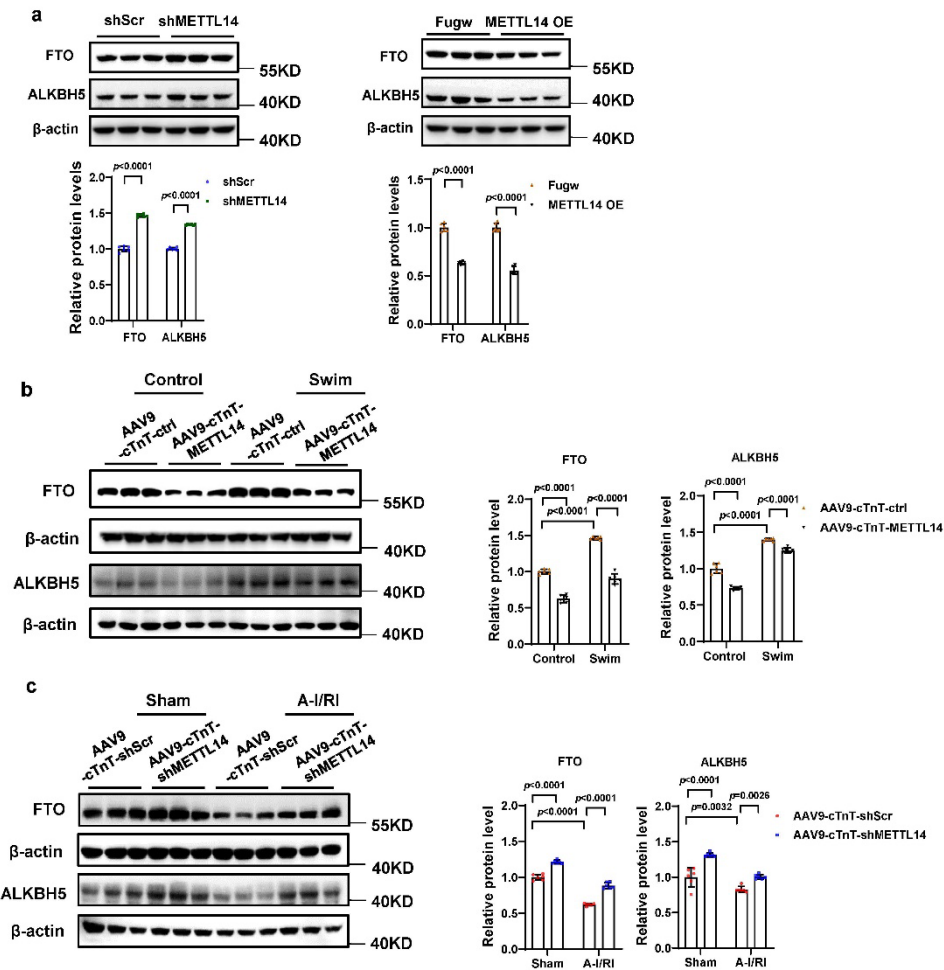

**Supplementary Fig. 11: Demethylase FTO and ALKBH5 were negatively regulated by METTL14 alteration.** (a) Representative western blot and statistical data of FTO and ALKBH5 in NRCMs with METTL14 knockdown or METTL14 overexpression (n=6 wells/group). (b-c) Representative western blot and statistical data of FTO and ALKBH5 expression levels in the mice hearts treated as indicated (n=6 mice/group). Fugw, control without METTL14 overexpression; METTL14 OE, METTL14 overexpression; shScr, Scramble short hairpin RNA; shMETTL14, METTL14 short hairpin RNA to knockdown METTL14; AAV9-cTnT-shScr, cardiac-specific troponin-T promoter-driven Scramble AAV9; AAV9-cTnT-shMETTL14, cardiac-specific troponin-T promoter-driven METTL14 knockdown AAV9; AAV9-cTnT-ctrl, cardiac-specific troponin-T promoter-driven control AAV9; AAV9-cTnT-METTL14, cardiac-specific troponin-T promoter-driven METTL14 overexpression AAV9. A-I/RI, acute myocardial ischemia-reperfusion injury. All data are expressed as means  $\pm$  SD. (a, independent-sample t-test, two-sided; b and c, Two-way ANOVA followed by Tukey's post hoc test.) Source data are provided as a Source Data file.



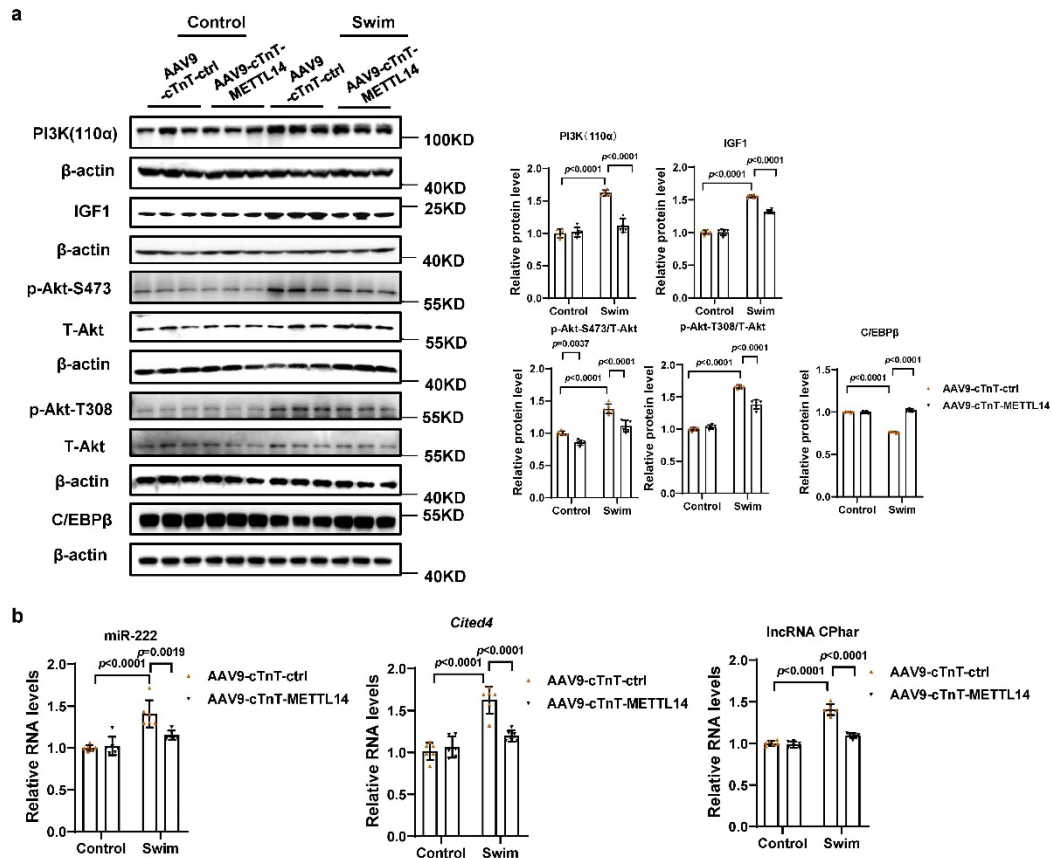

**Supplementary Fig. 12: Expression of previously reported factors and signaling pathways known to be involved in exercise-induced cardiac hypertrophy. (a)** Representative western blot and statistical data of IGF1/PI3K/Akt signaling and C/EBP $\beta$  expression levels in the mice hearts treated as indicated (n=6 mice/group). **(b)** qPCR analysis of miR-222, *Cited4*, and lncRNA CPhar expression levels in the hearts treated as indicated (n=6 mice/group). AAV9-cTnT-ctrl, cardiac-specific troponin-T promoter-driven control AAV9; AAV9-cTnT-METTL14, cardiac-specific troponin-T promoter-driven METTL14 overexpression AAV9. All data are expressed as means  $\pm$  SD. (**a** and **b**, Two-way ANOVA followed by Tukey's post hoc test.) Source data are provided as a Source Data file.

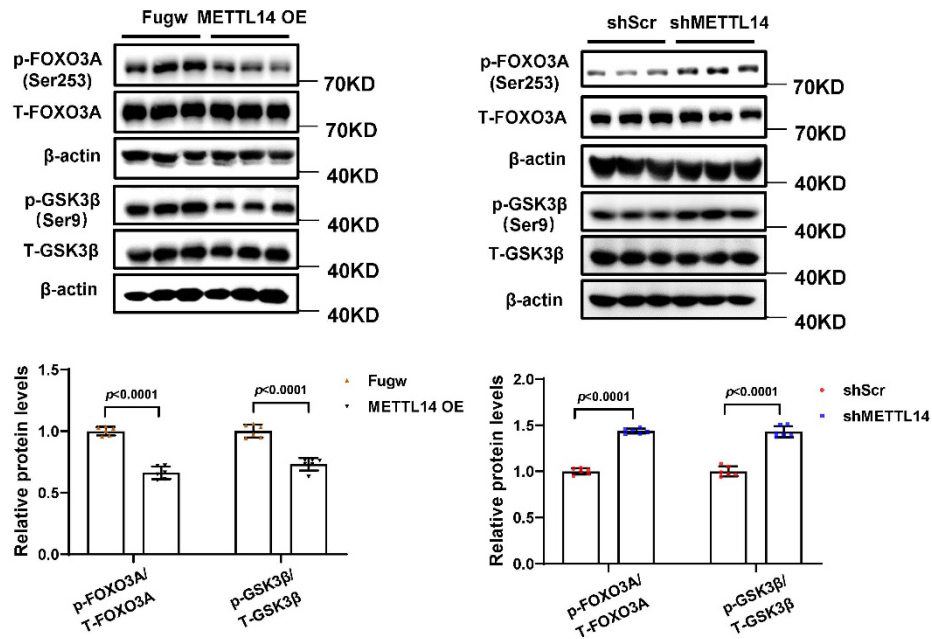

**Supplementary Fig. 13: The phosphorylation levels of Akt substrates including FOXO3a, and GSK3β.** Representative western blot and statistical data of phosphorylation levels of FOXO3a, and GSK3β in NRCMs with METTL14 knockdown or METTL14 overexpression (n=6 wells/group). Fugw, control without METTL14 overexpression; METTL14 OE, METTL14 overexpression; shScr, Scramble short hairpin RNA; shMETTL14, METTL14 short hairpin RNA to knockdown METTL14. All data are expressed as means  $\pm$  SD. (Independent-sample t-test, two-sided.) Source data are provided as a Source Data file.

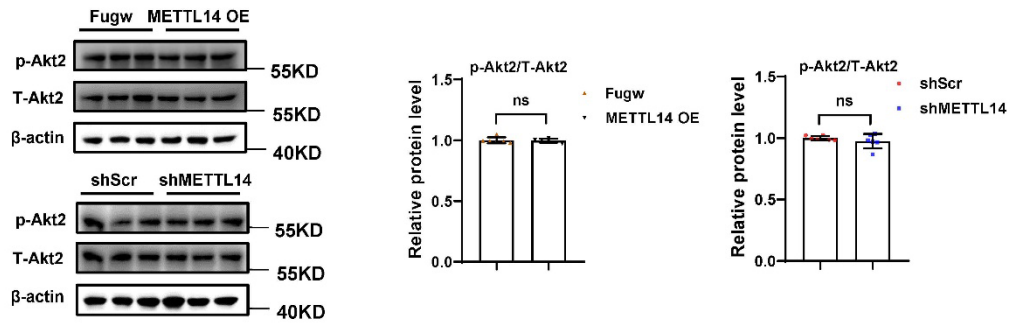

**Supplementary Fig. 14: The phosphorylation levels of Akt2 in NRCMs with METTL14 knockdown or METTL14 overexpression (n=6 wells/group).** Fugw, control without METTL14 overexpression; METTL14 OE, METTL14 overexpression; shScr, Scramble short hairpin RNA; shMETTL14, METTL14 short hairpin RNA to knockdown METTL14. ns, nonstatistically significant. All data are expressed as means  $\pm$  SD. (Independent-sample t-test, two-sided.) Source data are provided as a Source Data file.

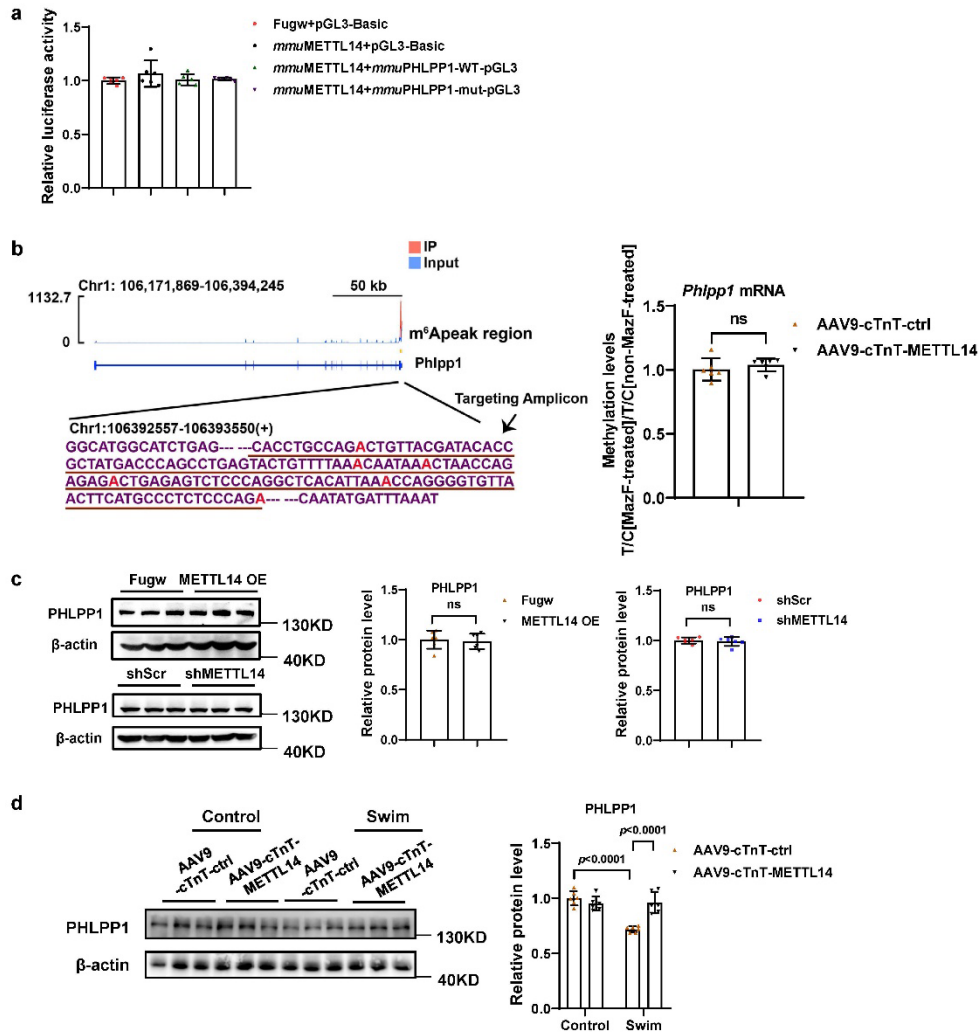

**Supplementary Fig. 15: *Phlpp1* mRNA m<sup>6</sup>A level and protein level were not affected by METTL14.** (a) Relative luciferase activity of mouse PHLPP1 wild type (PHLPP1-WT-pGL3) or m<sup>6</sup>A mutant (PHLPP1-mut-pGL3) reporter gene with or without mouse METTL14 overexpression (n=6/group). (b) The methylation levels of *Phlpp1* mRNA in mice hearts treated as indicated measured by MazF-qPCR (n=6 mice/group). (c) Representative western blot and statistical data of PHLPP1 in NRCMs with METTL14 knockdown or METTL14 overexpression (n=6 wells/group). (d) Representative western blot and statistical data of PHLPP1 expression level in the mice hearts treated as indicated (n=6 mice/group). Fugw, control without METTL14 overexpression; METTL14 OE, METTL14 overexpression; shScr, Scramble short hairpin RNA; shMETTL14, METTL14 short hairpin RNA to knockdown METTL14; AAV9-cTnT-ctrl, cardiac-specific troponin-T promoter-driven control AAV9; AAV9-cTnT-METTL14, cardiac-specific troponin-T promoter-driven METTL14 overexpression AAV9. ns, nonstatistically significant. All data are expressed as means ± SD. (a, one-way ANOVA followed by Dunnett T3 test; b and c, independent-sample t-test, two-sided; d, Two-way ANOVA followed by Tukey's post hoc test.) Source data are provided as a Source Data file.

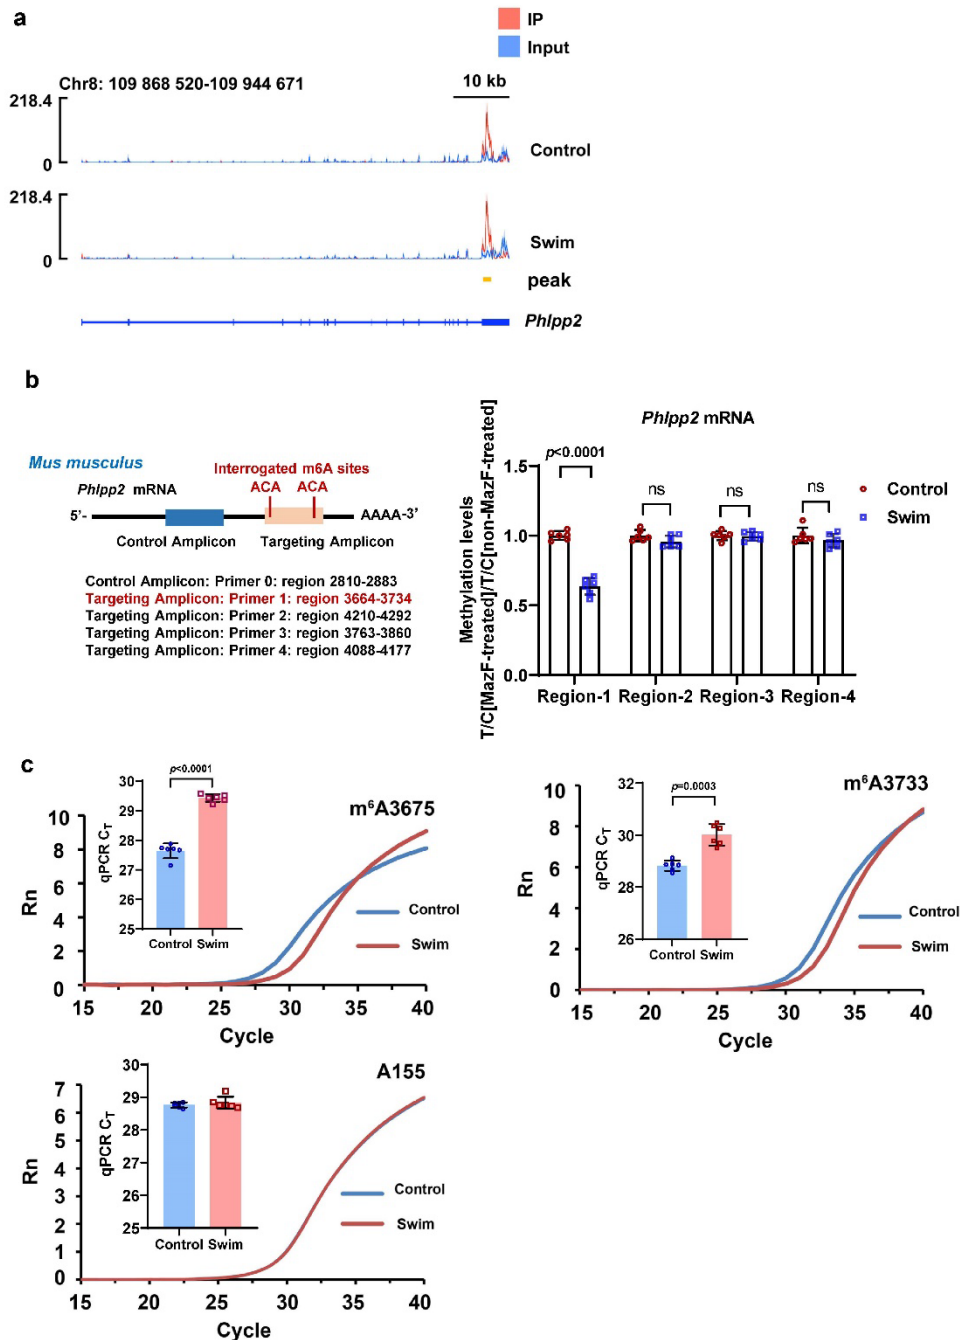

**Supplementary Fig. 16: RNA m<sup>6</sup>A modifications regulation in *Phlpp2* mRNA in response to exercise training in mouse heart.** (a) Integrative genomics viewer (IGV) tracks revealing the results of meRIP-seq (Red) and RNA-seq (Blue) reads distributions in *Phlpp2* mRNA of the swim and control. Seq, sequencing. (b) MazF-qPCR identified the methylation modification region of *Phlpp2* mRNA which is specifically regulated in response to swimming training (n=6 mice/group). (c) Real-time fluorescence amplification curves and bar plot of the threshold cycle ( $C_T$ ) of qPCR showing SELECT results for detecting m<sup>6</sup>A3675, m<sup>6</sup>A3733 and A155 sites (for input control) in *Phlpp2* mRNA between control and swim mice hearts (n=6 /group). ns, nonstatistically significant; All data are expressed as means  $\pm$  SD. (b and c, independent-sample t-test, two-sided.) Source data are provided as a Source Data file.
